# Supplementary material for: Sub-epidermal Expression of ENHANCER OF TRIPTYCHON AND CAPRICE1 and Its Role in Root Hair Formation Upon Pi Starvation
Source: Front Plant Sci. 2018 Sep 27;9:1411. doi: 10.3389/fpls.2018.01411 (PMC6171471; doi:10.3389/fpls.2018.01411)
Supplement: Supplementary file 7 [file Table_7.docx]

**Table S7 Pi dependent rescue ability of ETC1 promoter fragments – statistics**: Significance test results (*P*-values from Wilcoxon test, unpaired) of the differences between each genotype and the *cpc-2 etc1-1* double mutant for file-specific root hair cell percentage at both Pi conditions (Table S6).

|  | ***P*-value** | | | |
| --- | --- | --- | --- | --- |
| **Genotype** | **Phosphate sufficient (Pi+)** | | **Phosphate deficient (Pi-)** | |
| **H-file** | **N-file** | **H-file** | **N-file** |
| ***cpc-2*** | 0.0001 | NA | 0.0001 | NA |
|  |  |  |  |  |
| **Pro*ETC1-1371*:YFP-ETC1**  **(*cpc-2 etc1-1*) line I** | 0.0002 | NA | 0.0001 | 0.1675 |
| **Pro*ETC1-1371*:YFP-ETC1**  **(*cpc-2 etc1-1*) line II** | 9.0E-05 | NA | 0.0001 | 0.0767 |
|  |  |  |  |  |
| **Pro*ETC1-1921*: ETC1**  **(*cpc-2 etc1-1*) line 1** | 0.0001 | NA | 0.0001 | 0.0767 |
| **Pro*ETC1-1921*: ETC1**  **(*cpc-2 etc1-1*) line 8** | 0.0002 | NA | 0.0002 | 0.1451 |
| **Pro*ETC1-1676*: ETC1**  **(*cpc-2 etc1-1*) line 2** | 0.0090 | NA | 0.0001 | NA |
| **Pro*ETC1-1676*: ETC1**  **(*cpc-2 etc1-1*) line 1** | 0.1799 | NA | 0.0006 | NA |
| **Pro*ETC1-1371*: ETC1**  **(*cpc-2 etc1-1*) line 1** | 0.0014 | NA | 0.0001 | 0.3681 |
| **Pro*ETC1-1371*: ETC1**  **(*cpc-2 etc1-1*) line 4** | 0.0002 | NA | 0.0001 | NA |
| **Pro*ETC1-1183*: ETC1**  **(*cpc-2 etc1-1*) line 2** | 0.0002 | NA | 0.0001 | NA |
| **Pro*ETC1-1183*: ETC1**  **(*cpc-2 etc1-1*) line 17** | 0.4458 | NA | 0.0001 | 0.1675 |
| **Pro*ETC1-932*: ETC1**  **(*cpc-2 etc1-1*) line 28** | 0.0001 | NA | 0.0002 | NA |
| **Pro*ETC1-932*: ETC1**  **(*cpc-2 etc1-1*) line 19** | 0.0001 | NA | 0.0001 | NA |
| **Pro*ETC1-595*: ETC1**  **(*cpc-2 etc1-1*) line 26** | 1.0000 | NA | 0.5182 | NA |
| **Pro*ETC1-595*: ETC1**  **(*cpc-2 etc1-1*) line 5** | 0.7383 | NA | 1.0000 | NA |
| **Pro*ETC1-400*: ETC1**  **(*cpc-2 etc1-1*) line 39** | 0.7340 | NA | 0.5651 | NA |
| **Pro*ETC1-400*: ETC1**  **(*cpc-2 etc1-1*) line 12** | 0.8370 | NA | 0.5616 | NA |
| **Pro*ETC1*PHR1mut: ETC1**  **(*cpc-2 etc1-1*) line 3** | 0.0001 | NA | 0.0001 | 0.3681 |
