# Supplementary material for: Sub-epidermal Expression of ENHANCER OF TRIPTYCHON AND CAPRICE1 and Its Role in Root Hair Formation Upon Pi Starvation
Source: Front Plant Sci. 2018 Sep 27;9:1411. doi: 10.3389/fpls.2018.01411 (PMC6171471; doi:10.3389/fpls.2018.01411)
Supplement: Supplementary file 11 [file Table_11.xlsx]

## Sheet: Description
Sub-epidermal expression of ENHANCER OF TRIPTYCHON AND CAPRICE1 and its role in root hair formation upon Pi starvation
Louai Rishmawi1, Heike Wolff1, Andrea Schrader1*, Martin Huelskamp1*
Tools and publications used for the motif analysis and PLACE:
PlantPAN 2.0 (Chow et al., 2016), Salazar-Henao et al., 2016 and Higo et al., 1999: For the citations, see the main text.
Used sequence: ProETC1-982-(-545), adjacent sequence was only included in the output when a motif was overlapping with the ProETC1-932-(-595) fragment.
Sheet "PlantPANAthFragment": all results from PlantPAN 2.0 for the used sequence.
Sheet "Figure4 _region_all_scores": all results from PlantPAN 2.0 within the mapped ProETC1 fragment from our study +/-10 nt.
Sheet "Figure4_sel_score at least 0.9": Here, only motives with a "similar score" of PlantPAN 2.0 of at least 0.9 were included and only motifs selected for Figure 5 are listed.
Sheet "Motifs Salazar-Henao et al 2016": motifs identified to be enriched in the promoters of Pi-inducible genes related to root hair formation.
LEGEND for all sheets:
In this file: fragment = overlap of ProETC1-932 and ProETC1-595
includes Pi-induction-related motif found in Salazar-Henao et al., 2016
motif in fragment
motif partially in fragment
P1BS motif (derived from PLACE and mutated in this study)
motif in 10 nt up-/downstream of fragment border

## Sheet: PlantPANAthFragment
Matrix ID	Family	Position	Strand	Similar Score	Hit Sequence	TF ID or Motif name
Matrix ID	Family	Position	Strand	Similar Score	Hit Sequence	TF ID or Motif name
TF_motif_seq_0343	(Motif sequence only)	2	+	1	AAACAaa	ANAERO1CONSENSUS
TF_motif_seq_0257	NF-YB;NF-YA;NF-YC	5	+	0.8	CAAAT	AT1G09030;AT1G17590;AT1G21970;AT1G30500;AT1G54160;AT1G54830;AT1G56170;AT1G72830;AT2G38880;AT2G47810;AT3G05690;AT3G14020;AT3G20910;AT3G53340;AT4G14540;AT5G06510;AT5G12840;AT5G27910;AT5G38140;AT5G47640;AT5G47670;AT5G50470;AT5G50480
TF_motif_seq_0257	NF-YB;NF-YA;NF-YC	8	-	0.8	ATTGT	AT1G09030;AT1G17590;AT1G21970;AT1G30500;AT1G54160;AT1G54830;AT1G56170;AT1G72830;AT2G38880;AT2G47810;AT3G05690;AT3G14020;AT3G20910;AT3G53340;AT4G14540;AT5G06510;AT5G12840;AT5G27910;AT5G38140;AT5G47640;AT5G47670;AT5G50470;AT5G50480
TFmatrixID_0503	MADS box;MIKC	16	+	0.9	attataaaaaaaaAGAAAgaa	AT4G22950;AT5G10140;AT5G65050;AT5G65060;AT5G65070;AT5G65080;AT1G77080;AT2G45650;AT3G57390;AT4G11880
TFmatrixID_0570	TBP	16	+	0.93	attaTAAAAa	AT1G55520;AT3G13445
TFmatrixID_0585	TBP	16	+	0.96	attATAAAaaa	AT1G55520;AT3G13445
TF_motif_seq_0241	ZF-HD	16	+	1	ATTAT	AT1G75240
TFmatrixID_0274	MADS box;MIKC	17	-	0.93	ttatAAAAAaaaagaaagaaa	AT2G45660
TFmatrixID_0499	MADS box;MIKC	17	+	0.93	ttatAAAAAaaaagaaagaaa	AT4G22950;AT4G24540;AT4G37940;AT5G51860;AT5G51870;AT5G60910;AT5G62165;AT1G26310;AT2G14210;AT2G22630;AT2G45650;AT2G45660;AT3G30260;AT3G57230;AT3G57390;AT3G61120;AT4G09960;AT4G11880
TFmatrixID_0569	TBP	17	+	0.98	ttATAAAaaaaaaga	AT1G55520;AT3G13445
TFmatrixID_0274	MADS box;MIKC	19	-	0.95	ataaAAAAAaagaaagaaaga	AT2G45660
TFmatrixID_0499	MADS box;MIKC	19	+	0.95	ataaAAAAAaagaaagaaaga	AT4G22950;AT4G24540;AT4G37940;AT5G51860;AT5G51870;AT5G60910;AT5G62165;AT1G26310;AT2G14210;AT2G22630;AT2G45650;AT2G45660;AT3G30260;AT3G57230;AT3G57390;AT3G61120;AT4G09960;AT4G11880
TFmatrixID_0274	MADS box;MIKC	21	-	0.93	aaaaAAAAAgaaagaaagagg	AT2G45660
TFmatrixID_0499	MADS box;MIKC	21	+	0.93	aaaaAAAAAgaaagaaagagg	AT4G22950;AT4G24540;AT4G37940;AT5G51860;AT5G51870;AT5G60910;AT5G62165;AT1G26310;AT2G14210;AT2G22630;AT2G45650;AT2G45660;AT3G30260;AT3G57230;AT3G57390;AT3G61120;AT4G09960;AT4G11880
TF_motif_seq_0239	Dof	27	+	1	AAAGA	AT1G29160;AT1G64620;AT2G37590;AT3G21270;AT3G45610;AT3G47500;AT4G38000;AT5G39660;AT5G60200;AT5G60850;AT5G62940;AT2G46590;AT1G07640;AT1G21340;AT1G26790;AT1G47655;AT1G51700;AT1G69570;AT2G28510;AT2G28810;AT2G34140;AT3G50410;AT3G55370;AT3G61850;AT4G00940;AT4G21050;AT4G21080;AT4G24060;AT5G02460;AT5G62430;AT5G65590;AT5G66940
TF_motif_seq_0239	Dof	31	+	1	AAAGA	AT1G29160;AT1G64620;AT2G37590;AT3G21270;AT3G45610;AT3G47500;AT4G38000;AT5G39660;AT5G60200;AT5G60850;AT5G62940;AT2G46590;AT1G07640;AT1G21340;AT1G26790;AT1G47655;AT1G51700;AT1G69570;AT2G28510;AT2G28810;AT2G34140;AT3G50410;AT3G55370;AT3G61850;AT4G00940;AT4G21050;AT4G21080;AT4G24060;AT5G02460;AT5G62430;AT5G65590;AT5G66940
TFmatrixID_0638	Dof	33	+	0.99	agAAAGAgga	AT5G65590
TF_motif_seq_0239	Dof	35	+	1	AAAGA	AT1G29160;AT1G64620;AT2G37590;AT3G21270;AT3G45610;AT3G47500;AT4G38000;AT5G39660;AT5G60200;AT5G60850;AT5G62940;AT2G46590;AT1G07640;AT1G21340;AT1G26790;AT1G47655;AT1G51700;AT1G69570;AT2G28510;AT2G28810;AT2G34140;AT3G50410;AT3G55370;AT3G61850;AT4G00940;AT4G21050;AT4G21080;AT4G24060;AT5G02460;AT5G62430;AT5G65590;AT5G66940
TFmatrixID_0534	WRKY	40	+	0.91	ggatggGTCAA	AT1G13960;AT2G03340;AT2G04880;AT2G37260;AT3G01080;AT4G12020;AT4G26440;AT4G26640;AT4G30935;AT5G07100
TF_motif_seq_0237	GATA;tify	40	+	1	GGATG	AT1G51600;AT2G45050;AT3G06740;AT3G16870;AT3G21175;AT3G24050;AT3G54810;AT3G60530;AT4G17570;AT4G24470;AT4G26150;AT4G32890;AT4G34680;AT5G25830;AT5G26930;AT5G56860;AT5G66320;AT2G18380;AT3G50870;AT4G36620
TF_motif_seq_0257	NF-YB;NF-YA;NF-YC	42	-	0.8	ATGGG	AT1G09030;AT1G17590;AT1G21970;AT1G30500;AT1G54160;AT1G54830;AT1G56170;AT1G72830;AT2G38880;AT2G47810;AT3G05690;AT3G14020;AT3G20910;AT3G53340;AT4G14540;AT5G06510;AT5G12840;AT5G27910;AT5G38140;AT5G47640;AT5G47670;AT5G50470;AT5G50480
TFmatrixID_0448	WRKY	43	+	0.96	tggGTCAAgtg	AT1G18860;AT1G29280;AT1G29860;AT1G55600;AT1G62300;AT1G64000;AT1G68150;AT1G69810;AT2G21900;AT2G25000;AT2G34830;AT2G44745;AT2G46400;AT3G01970;AT3G04670;AT3G58710;AT3G62340;AT4G04450;AT4G11070;AT4G18170;AT4G22070;AT4G24240;AT4G39410;AT5G15130;AT5G26170;AT5G28650;AT5G41570;AT5G43290;AT5G45050
TFmatrixID_0458	WRKY	43	+	1	tggGTCAAgt	AT1G18860;AT1G29280;AT1G29860;AT1G55600;AT1G62300;AT1G64000;AT1G68150;AT1G69810;AT2G21900;AT2G34830;AT2G40740;AT2G44745;AT2G46400;AT3G01970;AT3G04670;AT3G58710;AT3G62340;AT4G04450;AT4G11070;AT4G18170;AT4G22070;AT4G24240;AT4G31800;AT4G39410;AT5G15130;AT5G26170;AT5G28650;AT5G41570;AT5G43290;AT5G45050
TFmatrixID_0630	WRKY	43	+	0.97	tggGTCAAgt	AT4G31800
TFmatrixID_0382	NAC;NAM	44	+	1	ggGTCAAgt	AT1G01720;AT1G52880;AT1G52890;AT1G69490;AT3G04070;AT3G15500;AT3G15510;AT4G27410
TFmatrixID_0443	WRKY	44	+	0.99	ggGTCAAg	AT1G29860;AT1G64000;AT1G66550;AT1G66560;AT1G66600;AT1G68150;AT1G69810;AT1G80590;AT2G40740;AT2G40750;AT2G44745;AT2G46400;AT3G01970;AT3G56400;AT3G62340;AT4G04450;AT4G11070;AT4G18170;AT4G23810;AT4G39410;AT5G22570;AT5G26170;AT5G41570;AT5G43290;AT5G45050;AT5G45260
TFmatrixID_0445	WRKY	44	+	1	ggGTCAAg	AT1G18860;AT1G29280;AT1G29860;AT1G55600;AT1G62300;AT1G64000;AT1G68150;AT1G69810;AT1G80840;AT2G21900;AT2G34830;AT2G44745;AT3G01970;AT3G04670;AT3G58710;AT3G62340;AT4G04450;AT4G18170;AT4G22070;AT4G24240;AT4G39410;AT5G15130;AT5G26170;AT5G28650;AT5G41570;AT5G43290;AT5G45050;AT5G45260
TFmatrixID_0449	WRKY	44	+	0.96	ggGTCAAg	AT1G13960;AT2G03340;AT2G30250;AT2G37260;AT3G01080;AT4G12020;AT4G26440;AT4G26640;AT4G30935;AT5G07100
TFmatrixID_0465	WRKY	44	+	0.98	ggGTCAAg	AT1G13960;AT2G03340;AT2G37260;AT3G01080;AT4G12020;AT4G26440;AT4G26640;AT4G30935;AT5G07100;AT5G56270
TF_motif_seq_0265	(Motif sequence only)	44	+	0.8	GGGTC	SORLIP2AT
TF_motif_seq_0246	Homeodomain;TALE	45	-	1	GGTCA	AT1G23380;AT1G62360;AT1G70510;AT4G08150
TF_motif_seq_0270	WRKY	45	-	1	GGTCA	AT1G13960;AT1G18860;AT1G29280;AT1G29860;AT1G30650;AT1G55600;AT1G62300;AT1G64000;AT1G66550;AT1G68150;AT1G69310;AT1G69810;AT1G80590;AT1G80840;AT2G03340;AT2G23320;AT2G24570;AT2G25000;AT2G30250;AT2G30590;AT2G34830;AT2G37260;AT2G38470;AT2G40740;AT2G40750;AT2G44745;AT2G46130;AT2G46400;AT2G47260;AT3G01080;AT3G01970;AT3G04670;AT3G56400;AT3G58710;AT4G01250;AT4G01720;AT4G04450;AT4G12020;AT4G18170;AT4G22070…
TF_motif_seq_0271	bZIP	45	-	0.8	GGTCA	AT1G77920;AT3G12250;AT5G06950;AT5G06960;AT5G10030;AT5G65210;AT1G22070
TF_motif_seq_0339	WRKY	45	-	1	gGTCAA	AT1G13960;AT1G18860;AT1G29280;AT1G29860;AT1G30650;AT1G55600;AT1G62300;AT1G64000;AT1G66550;AT1G68150;AT1G69310;AT1G69810;AT1G80590;AT1G80840;AT2G03340;AT2G23320;AT2G24570;AT2G25000;AT2G30250;AT2G30590;AT2G34830;AT2G37260;AT2G38470;AT2G40740;AT2G40750;AT2G44745;AT2G46130;AT2G46400;AT2G47260;AT3G01080;AT3G01970;AT3G04670;AT3G56400;AT3G58710;AT4G01250;AT4G01720;AT4G04450;AT4G12020;AT4G18170;AT4G22070…
TF_motif_seq_0275	(Motif sequence only)	46	-	1	GTCAA	WBOXATNPR1
TF_motif_seq_0300	bHLH	48	+	0.83	CAAGTg	AT1G09530;AT2G20180;AT4G17880;AT5G46760
TF_motif_seq_0300	bHLH	48	-	0.83	cAAGTG	AT1G09530;AT2G20180;AT4G17880;AT5G46760
TF_motif_seq_0301	bHLH	48	-	1	cAAGTG	AT1G32640
TF_motif_seq_0302	bHLH	48	+	1	CAAGTg	AT5G08130;AT3G26744
TF_motif_seq_0302	bHLH	48	-	1	cAAGTG	AT5G08130;AT3G26744
TF_motif_seq_0249	(Motif sequence only)	48	-	0.8	CAAGT	ABRELATERD1
TF_motif_seq_0249	(Motif sequence only)	49	+	0.8	AAGTG	ABRELATERD1
TF_motif_seq_0275	(Motif sequence only)	51	-	0.8	GTGAA	WBOXATNPR1
TF_motif_seq_0271	bZIP	52	+	0.8	TGAAG	AT1G77920;AT3G12250;AT5G06950;AT5G06960;AT5G10030;AT5G65210;AT1G22070
TF_motif_seq_0014	bZIP	54	-	0.8	aaggcGTCAT	AT5G06950
TF_motif_seq_0239	Dof	54	+	1	AAGGC	AT1G29160;AT1G64620;AT2G37590;AT3G21270;AT3G45610;AT3G47500;AT4G38000;AT5G39660;AT5G60200;AT5G60850;AT5G62940;AT2G46590;AT1G07640;AT1G21340;AT1G26790;AT1G47655;AT1G51700;AT1G69570;AT2G28510;AT2G28810;AT2G34140;AT3G50410;AT3G55370;AT3G61850;AT4G00940;AT4G21050;AT4G21080;AT4G24060;AT5G02460;AT5G62430;AT5G65590;AT5G66940
TFmatrixID_0185	bZIP	55	+	0.9	aggCGTCAtg	AT1G08320;AT1G68640;AT1G77920;AT5G06839
TFmatrixID_0195	bZIP	55	+	0.93	aggCGTCAtg	AT1G08320;AT1G68640;AT5G06839;AT5G06950
TFmatrixID_0199	bZIP	55	+	0.97	aggCGTCAtg	AT1G08320;AT1G68640;AT5G06839;AT5G65210
TFmatrixID_0300	Homeodomain;TALE	55	-	0.96	aggCGTCAtg	AT1G62360;AT1G70510;AT4G08150
TFmatrixID_0533	bZIP	55	+	0.92	aggCGTCAtga	AT1G08320;AT1G68640;AT5G06839;AT5G65210
TF_motif_seq_0450	(Motif sequence only)	55	-	0.75	aggCGTCA	PALINDROMICCBOXGM
TFmatrixID_0196	bZIP	56	+	0.88	ggCGTCAt	AT1G08320;AT1G68640;AT5G06839;AT5G06960
TF_motif_seq_0009	(Motif sequence only)	57	+	0.7	GCGTCatgaa	LS7ATPR1
TF_motif_seq_0246	Homeodomain;TALE	58	-	1	CGTCA	AT1G23380;AT1G62360;AT1G70510;AT4G08150
TF_motif_seq_0271	bZIP	58	-	1	CGTCA	AT1G77920;AT3G12250;AT5G06950;AT5G06960;AT5G10030;AT5G65210;AT1G22070
TF_motif_seq_0275	(Motif sequence only)	59	-	0.8	GTCAT	WBOXATNPR1
TFmatrixID_0289	Homeodomain;HD-ZIP	63	-	0.97	tgAATCAtgc	AT2G22800;AT4G16780;AT4G17460;AT4G37790;AT5G06710;AT5G47370
TF_motif_seq_0237	GATA;tify	65	-	1	AATCA	AT1G51600;AT2G45050;AT3G06740;AT3G16870;AT3G21175;AT3G24050;AT3G54810;AT3G60530;AT4G17570;AT4G24470;AT4G26150;AT4G32890;AT4G34680;AT5G25830;AT5G26930;AT5G56860;AT5G66320;AT2G18380;AT3G50870;AT4G36620
TF_motif_seq_0268	(Motif sequence only)	65	-	1	AATCA	ARR1AT
TF_motif_seq_0237	GATA;tify	72	+	1	CGATG	AT1G51600;AT2G45050;AT3G06740;AT3G16870;AT3G21175;AT3G24050;AT3G54810;AT3G60530;AT4G17570;AT4G24470;AT4G26150;AT4G32890;AT4G34680;AT5G25830;AT5G26930;AT5G56860;AT5G66320;AT2G18380;AT3G50870;AT4G36620
TFmatrixID_0422	TCP	73	-	0.96	gatGGTCCca	AT1G53230
TFmatrixID_0427	TCP	74	-	0.96	atGGTCCc	AT3G02150;AT5G08070;AT5G60970
TFmatrixID_0432	TCP	74	-	0.88	atGGTCCc	AT3G02150;AT5G08070
TFmatrixID_0436	TCP	74	-	0.88	atGGTCCcaa	AT2G31070
TFmatrixID_0440	TCP	74	-	0.99	atGGTCCc	AT1G67260;AT2G31070;AT3G02150
TF_motif_seq_0265	(Motif sequence only)	76	+	0.8	GGTCC	SORLIP2AT
TF_motif_seq_0265	(Motif sequence only)	76	-	0.8	GGTCC	SORLIP2AT
TF_motif_seq_0261	(Motif sequence only)	77	-	0.8	GTCCC	SURECOREATSULTR11
TF_motif_seq_0265	(Motif sequence only)	77	-	0.8	GTCCC	SORLIP2AT
TF_motif_seq_0257	NF-YB;NF-YA;NF-YC	80	+	0.8	CCAAC	AT1G09030;AT1G17590;AT1G21970;AT1G30500;AT1G54160;AT1G54830;AT1G56170;AT1G72830;AT2G38880;AT2G47810;AT3G05690;AT3G14020;AT3G20910;AT3G53340;AT4G14540;AT5G06510;AT5G12840;AT5G27910;AT5G38140;AT5G47640;AT5G47670;AT5G50470;AT5G50480
TF_motif_seq_0258	Dehydrin	80	+	0.8	CCAAC	U01377
TF_motif_seq_0255	AP2;RAV;B3	81	+	1	CAACA	AT1G25560;AT1G13260
TF_motif_seq_0257	NF-YB;NF-YA;NF-YC	84	+	0.8	CAAAT	AT1G09030;AT1G17590;AT1G21970;AT1G30500;AT1G54160;AT1G54830;AT1G56170;AT1G72830;AT2G38880;AT2G47810;AT3G05690;AT3G14020;AT3G20910;AT3G53340;AT4G14540;AT5G06510;AT5G12840;AT5G27910;AT5G38140;AT5G47640;AT5G47670;AT5G50470;AT5G50480
TFmatrixID_0005	AT-Hook	85	+	0.97	aaATTAAatg	AT4G14465
TFmatrixID_0007	AT-Hook	85	+	0.96	aAATTAaatg	AT4G35390
TF_motif_seq_0241	ZF-HD	87	+	1	ATTAA	AT1G75240
TF_motif_seq_0254	AP2;ERF	89	-	0.8	TAAAT	AT3G14230
TF_motif_seq_0444	Homeodomain;HD-ZIP	89	+	0.97	TAAATgaa	AT4G21750;AT4G04890
TF_motif_seq_0445	(Motif sequence only)	89	+	0.97	TAAATgaa	L1BOXATPDF1
TFmatrixID_0585	TBP	96	+	0.98	aatATAAAatc	AT1G55520;AT3G13445
TFmatrixID_0418	TBP	97	+	1	ATATAaa	AT1G55520;AT3G13445
TFmatrixID_0569	TBP	97	+	0.98	atATAAAatccacgt	AT1G55520;AT3G13445
TF_motif_seq_0254	AP2;ERF	97	+	0.8	ATATA	AT3G14230
TFmatrixID_0497	bHLH	100	+	0.96	taaaatccACGTGt	AT2G20180;AT2G46970;AT4G28790;AT4G28800;AT4G28811;AT4G28815;AT5G67110
TFmatrixID_0111	bHLH	101	+	0.89	aaaatcCACGTgtcatgt	AT1G09530
TFmatrixID_0111	bHLH	101	-	0.9	aaaatccACGTGtcatgt	AT1G09530
TFmatrixID_0112	bHLH	101	-	0.9	aaaatccACGTGtcatg	AT1G09530
TFmatrixID_0558	bHLH	101	+	0.89	aaaatcCACGTgtcatgt	AT1G09530;AT2G46970;AT4G28790;AT4G28800;AT4G28811;AT4G28815;AT5G61270;AT5G67110
TFmatrixID_0558	bHLH	101	-	0.9	aaaatccACGTGtcatgt	AT1G09530;AT2G46970;AT4G28790;AT4G28800;AT4G28811;AT4G28815;AT5G61270;AT5G67110
TFmatrixID_0559	bHLH	101	-	0.9	aaaatccACGTGtcatg	AT1G09530;AT2G46970;AT4G28790;AT4G28800;AT4G28811;AT4G28815;AT5G61270;AT5G67110
TFmatrixID_0112	bHLH	102	+	0.85	aaatcCACGTgtcatgt	AT1G09530
TFmatrixID_0182	bZIP	102	-	0.95	aaatcCACGTgtc	AT1G45249;AT3G19290
TFmatrixID_0496	bZIP	102	+	0.92	aaatcCACGTgtcatg	AT3G17609;AT5G11260
TFmatrixID_0496	bZIP	102	-	0.92	aaatccACGTGtcatg	AT3G17609;AT5G11260
TFmatrixID_0559	bHLH	102	+	0.85	aaatcCACGTgtcatgt	AT1G09530;AT2G46970;AT4G28790;AT4G28800;AT4G28811;AT4G28815;AT5G61270;AT5G67110
TFmatrixID_0163	bHLH	103	-	0.94	aatcCACGTgtc	AT1G10120;AT1G18400;AT1G25330;AT1G26260;AT1G68920;AT1G73830;AT2G18300;AT3G07340;AT3G23690;AT4G34530;AT5G50915;AT5G62610
TFmatrixID_0173	bHLH	103	-	1	aatcCACGTg	AT2G46510;AT4G09820;AT4G16430;AT5G46760;AT5G46830
TFmatrixID_0495	BES1	103	+	0.98	aatcCACGTgtcat	AT1G75080
TFmatrixID_0495	BES1	103	-	0.97	aatccACGTGtcat	AT1G75080
TF_motif_seq_0237	GATA;tify	103	-	1	AATCC	AT1G51600;AT2G45050;AT3G06740;AT3G16870;AT3G21175;AT3G24050;AT3G54810;AT3G60530;AT4G17570;AT4G24470;AT4G26150;AT4G32890;AT4G34680;AT5G25830;AT5G26930;AT5G56860;AT5G66320;AT2G18380;AT3G50870;AT4G36620
TF_motif_seq_0252	Myb/SANT;MYB;ARR-B	103	-	1	AATCC	AT2G01760;AT3G16857;AT4G16110;AT4G18020;AT4G31920;AT5G58080;AT1G67710;AT1G49190;AT2G25180;AT5G49240
TF_motif_seq_0268	(Motif sequence only)	103	-	1	AATCC	ARR1AT
TFmatrixID_0171	bHLH	104	+	0.99	atcCACGTgt	AT5G08130
TFmatrixID_0183	bZIP	104	+	0.94	atcCACGTgtc	AT1G49720;AT3G19290
TFmatrixID_0187	bZIP	104	-	0.95	atcCACGTgt	AT2G36270
TFmatrixID_0190	bZIP	104	+	0.99	atCCACGtgt	AT2G35530;AT2G46270
TFmatrixID_0194	bZIP	104	+	0.97	atcCACGTgt	AT2G35530;AT4G36730
TFmatrixID_0203	bZIP	104	-	0.98	atccACGTGtca	AT3G54620
TFmatrixID_0494	BES1	104	+	0.97	atccACGTGtc	AT1G19350
TFmatrixID_0505	bHLH	104	+	0.99	atcCACGTgt	AT1G09530;AT2G46970;AT4G28790;AT4G28800;AT4G28811;AT4G28815;AT5G61270;AT5G67110
TFmatrixID_0515	bZIP	104	+	0.84	atccACGTGtcatgttcag	AT1G49720;AT3G19290
TF_motif_seq_0254	AP2;ERF	104	+	0.8	ATCCA	AT3G14230
TF_motif_seq_0043	(Motif sequence only)	104	-	0.93	atcCACGTgt	ABREATRD22
TF_motif_seq_0115	(Motif sequence only)	104	-	0.83	atccacgTGTCA	HY5AT
TFmatrixID_0160	bHLH	105	+	1	tcCACGTgtc	AT1G32640;AT2G46510;AT4G09820;AT4G16430;AT5G46830
TFmatrixID_0160	bHLH	105	-	1	tccACGTGtc	AT1G32640;AT2G46510;AT4G09820;AT4G16430;AT5G46830
TFmatrixID_0161	bHLH	105	+	1	tccACGTGt	AT1G10120;AT1G18400;AT1G25330;AT1G26260;AT1G59640;AT1G68920;AT1G73830;AT3G07340;AT3G23690;AT4G34530;AT5G50915;AT5G62610
TFmatrixID_0162	bHLH	105	+	0.99	tcCACGTgtc	AT1G69010
TFmatrixID_0162	bHLH	105	-	0.99	tccACGTGtc	AT1G69010
TFmatrixID_0163	bHLH	105	+	0.94	tccACGTGtcat	AT1G10120;AT1G18400;AT1G25330;AT1G26260;AT1G68920;AT1G73830;AT2G18300;AT3G07340;AT3G23690;AT4G34530;AT5G50915;AT5G62610
TFmatrixID_0164	bHLH	105	+	1	tcCACGTgtc	AT2G20180;AT2G46970;AT4G28790;AT4G28800;AT4G28811;AT4G28815;AT5G67110
TFmatrixID_0164	bHLH	105	-	1	tccACGTGtc	AT2G20180;AT2G46970;AT4G28790;AT4G28800;AT4G28811;AT4G28815;AT5G67110
TFmatrixID_0168	bHLH	105	+	1	tcCACGTgtc	AT2G46510;AT4G16430;AT4G17880;AT5G46830
TFmatrixID_0168	bHLH	105	-	1	tccACGTGtc	AT2G46510;AT4G16430;AT4G17880;AT5G46830
TFmatrixID_0169	bHLH	105	+	1	tcCACGTgtc	AT1G10120;AT1G18400;AT1G25330;AT1G26260;AT1G68920;AT1G73830;AT3G07340;AT3G23690;AT4G34530;AT4G36540;AT5G50915;AT5G62610
TFmatrixID_0169	bHLH	105	-	1	tccACGTGtc	AT1G10120;AT1G18400;AT1G25330;AT1G26260;AT1G68920;AT1G73830;AT3G07340;AT3G23690;AT4G34530;AT4G36540;AT5G50915;AT5G62610
TFmatrixID_0170	bHLH	105	-	1	tcCACGTgt	AT4G28790;AT4G28800;AT4G28811;AT4G28815;AT4G36930;AT5G67110
TFmatrixID_0172	bHLH	105	+	0.99	tcCACGTgtc	AT5G38860
TFmatrixID_0172	bHLH	105	-	0.99	tccACGTGtc	AT5G38860
TFmatrixID_0175	bHLH	105	+	1	tcCACGTgtc	AT1G51070;AT5G54680
TFmatrixID_0175	bHLH	105	-	1	tccACGTGtc	AT1G51070;AT5G54680
TFmatrixID_0177	bHLH	105	+	1	tcCACGTgtc	AT1G03040;AT2G24260;AT3G07340;AT4G02590;AT4G28811;AT4G30980;AT4G34530;AT5G58010
TFmatrixID_0177	bHLH	105	-	1	tccACGTGtc	AT1G03040;AT2G24260;AT3G07340;AT4G02590;AT4G28811;AT4G30980;AT4G34530;AT5G58010
TFmatrixID_0181	bZIP	105	+	0.99	tCCACGtgt	AT1G32150;AT2G35530
TFmatrixID_0182	bZIP	105	+	1	tccACGTGtcatg	AT1G45249;AT3G19290
TFmatrixID_0183	bZIP	105	-	1	tccACGTGtca	AT1G49720;AT3G19290
TFmatrixID_0184	bZIP	105	+	0.96	tccACGTGtc	AT1G49720;AT3G19290
TFmatrixID_0184	bZIP	105	-	1	tcCACGTgtc	AT1G49720;AT3G19290
TFmatrixID_0192	bZIP	105	+	0.99	tCCACGtgt	AT4G01120
TFmatrixID_0494	BES1	105	-	0.97	tcCACGTgtca	AT1G19350
TFmatrixID_0506	bHLH	105	+	0.98	tcCACGTg	AT2G24260;AT2G43010;AT2G46970;AT4G28790;AT4G28800;AT4G28811;AT4G28815;AT5G61270;AT5G67110
TFmatrixID_0597	bHLH	105	+	0.88	tcCACGTgtc	AT1G09530
TFmatrixID_0597	bHLH	105	-	0.88	tccACGTGtc	AT1G09530
TF_motif_seq_0029	(Motif sequence only)	105	-	0.9	tccacGTGTC	ACEATCHS
TF_motif_seq_0263	(Motif sequence only)	105	+	0.8	TCCAC	SORLIP1AT
TF_motif_seq_0353	(Motif sequence only)	105	-	0.84	tcCACGT	ACGTABREMOTIFA2OSEM
TF_motif_seq_0459	(Motif sequence only)	105	-	0.86	tcCACGTg	ABREATCONSENSUS
TF_motif_seq_0492	(Motif sequence only)	105	-	0.88	tccACGTGt	GBOXLERBCS
TFmatrixID_0157	bHLH	106	-	0.99	cCACGTg	AT2G46510;AT4G09820;AT4G16430;AT5G46830
TFmatrixID_0158	bHLH	106	+	0.98	cCACGTgt	AT1G01260;AT1G12860;AT2G46510;AT4G16430;AT5G46830;AT5G57150
TFmatrixID_0158	bHLH	106	-	1	ccACGTGt	AT1G01260;AT1G12860;AT2G46510;AT4G16430;AT5G46830;AT5G57150
TFmatrixID_0159	bHLH	106	-	1	cCACGTg	AT1G09530;AT2G46970;AT4G28790;AT4G28800;AT4G28811;AT4G28815;AT5G61270;AT5G67110
TFmatrixID_0161	bHLH	106	-	1	cCACGTgtc	AT1G10120;AT1G18400;AT1G25330;AT1G26260;AT1G59640;AT1G68920;AT1G73830;AT3G07340;AT3G23690;AT4G34530;AT5G50915;AT5G62610
TFmatrixID_0165	bHLH	106	+	0.97	cCACGTgt	AT1G51070;AT3G23210
TFmatrixID_0166	bHLH	106	+	0.99	cCACGTgt	AT4G00050;AT4G28790;AT4G28811;AT5G61270;AT5G67110
TFmatrixID_0166	bHLH	106	-	0.98	ccACGTGt	AT4G00050;AT4G28790;AT4G28811;AT5G61270;AT5G67110
TFmatrixID_0170	bHLH	106	+	0.97	ccACGTGtc	AT4G28790;AT4G28800;AT4G28811;AT4G28815;AT4G36930;AT5G67110
TFmatrixID_0171	bHLH	106	-	1	ccACGTGtca	AT5G08130
TFmatrixID_0174	bHLH	106	+	0.75	CCACGtgt	AT1G10120;AT1G18400;AT1G25330;AT1G26260;AT1G68920;AT1G73830;AT2G24260;AT3G07340;AT3G23690;AT4G30980;AT4G34530;AT5G48560;AT5G50915;AT5G58010;AT5G62610
TFmatrixID_0174	bHLH	106	-	0.75	ccaCGTGT	AT1G10120;AT1G18400;AT1G25330;AT1G26260;AT1G68920;AT1G73830;AT2G24260;AT3G07340;AT3G23690;AT4G30980;AT4G34530;AT5G48560;AT5G50915;AT5G58010;AT5G62610
TFmatrixID_0179	bHLH	106	+	0.98	cCACGTgt	AT1G10120;AT1G18400;AT1G25330;AT1G26260;AT1G68920;AT1G73830;AT2G24260;AT3G07340;AT3G23690;AT4G30980;AT4G34530;AT5G50915;AT5G58010;AT5G62610
TFmatrixID_0179	bHLH	106	-	0.97	ccACGTGt	AT1G10120;AT1G18400;AT1G25330;AT1G26260;AT1G68920;AT1G73830;AT2G24260;AT3G07340;AT3G23690;AT4G30980;AT4G34530;AT5G50915;AT5G58010;AT5G62610
TFmatrixID_0187	bZIP	106	+	1	ccACGTGtca	AT2G36270
TFmatrixID_0193	bZIP	106	+	0.88	CCACGtgt	AT3G19290;AT4G34000
TFmatrixID_0193	bZIP	106	-	0.88	ccaCGTGT	AT3G19290;AT4G34000
TFmatrixID_0194	bZIP	106	-	0.96	ccACGTGtca	AT2G35530;AT4G36730
TFmatrixID_0202	bZIP	106	+	0.97	cCACGTgt	AT1G03970;AT5G44080
TFmatrixID_0202	bZIP	106	-	1	ccACGTGt	AT1G03970;AT5G44080
TFmatrixID_0489	bZIP	106	+	1	cCACGTgt	AT2G35530
TFmatrixID_0497	bHLH	106	-	0.99	cCACGTgtcatgtt	AT2G20180;AT2G46970;AT4G28790;AT4G28800;AT4G28811;AT4G28815;AT5G67110
TFmatrixID_0505	bHLH	106	-	0.94	ccACGTGtca	AT1G09530;AT2G46970;AT4G28790;AT4G28800;AT4G28811;AT4G28815;AT5G61270;AT5G67110
TFmatrixID_0511	bHLH	106	+	0.95	cCACGTgt	AT1G32640;AT2G46510;AT4G09820;AT4G16430;AT5G46830
TFmatrixID_0511	bHLH	106	-	0.95	ccACGTGt	AT1G32640;AT2G46510;AT4G09820;AT4G16430;AT5G46830
TFmatrixID_0513	bHLH	106	+	0.99	cCACGTgt	AT2G46510;AT4G09820;AT4G16430;AT5G46760;AT5G46830
TFmatrixID_0513	bHLH	106	-	0.99	ccACGTGt	AT2G46510;AT4G09820;AT4G16430;AT5G46760;AT5G46830
TFmatrixID_0514	bHLH	106	+	0.96	ccACGTGt	AT2G46510;AT4G16430;AT4G17880;AT5G46830
TFmatrixID_0514	bHLH	106	-	0.95	cCACGTgt	AT2G46510;AT4G16430;AT4G17880;AT5G46830
TF_motif_seq_0019	bZIP	106	+	0.8	CCACGtgtca	AT3G54620;AT4G02640
TF_motif_seq_0410	bHLH	106	-	0.75	ccaCGTGT	AT1G32640
TF_motif_seq_0424	bZIP	106	+	0.88	CCACGtgt	AT1G03970;AT2G46270;AT4G01120;AT4G36730
TF_motif_seq_0374	(Motif sequence only)	106	-	1	cCACGTg	ABRERATCAL
TF_motif_seq_0492	(Motif sequence only)	106	+	0.88	cCACGTgtc	GBOXLERBCS
TFmatrixID_0157	bHLH	107	+	0.99	cACGTGt	AT2G46510;AT4G09820;AT4G16430;AT5G46830
TFmatrixID_0159	bHLH	107	+	1	cACGTGt	AT1G09530;AT2G46970;AT4G28790;AT4G28800;AT4G28811;AT4G28815;AT5G61270;AT5G67110
TFmatrixID_0173	bHLH	107	+	1	cACGTGtcat	AT2G46510;AT4G09820;AT4G16430;AT5G46760;AT5G46830
TFmatrixID_0506	bHLH	107	-	0.98	cACGTGtc	AT2G24260;AT2G43010;AT2G46970;AT4G28790;AT4G28800;AT4G28811;AT4G28815;AT5G61270;AT5G67110
TF_motif_seq_0240	bZIP	107	-	1	CACGT	AT3G54620;AT4G02640
TF_motif_seq_0300	bHLH	107	+	1	CACGTg	AT1G09530;AT2G20180;AT4G17880;AT5G46760
TF_motif_seq_0300	bHLH	107	-	1	cACGTG	AT1G09530;AT2G20180;AT4G17880;AT5G46760
TF_motif_seq_0301	bHLH	107	+	1	CACGTg	AT1G32640
TF_motif_seq_0301	bHLH	107	-	1	cACGTG	AT1G32640
TF_motif_seq_0302	bHLH	107	+	1	CACGTg	AT5G08130;AT3G26744
TF_motif_seq_0302	bHLH	107	-	1	cACGTG	AT5G08130;AT3G26744
TF_motif_seq_0249	(Motif sequence only)	107	-	1	CACGT	ABRELATERD1
TF_motif_seq_0374	(Motif sequence only)	107	+	1	cACGTGt	ABRERATCAL
TF_motif_seq_0459	(Motif sequence only)	107	+	0.86	cACGTGtc	ABREATCONSENSUS
TF_motif_seq_0240	bZIP	108	+	1	ACGTG	AT3G54620;AT4G02640
TF_motif_seq_0249	(Motif sequence only)	108	+	1	ACGTG	ABRELATERD1
TF_motif_seq_0353	(Motif sequence only)	108	+	1	ACGTGtc	ACGTABREMOTIFA2OSEM
TF_motif_seq_0354	(Motif sequence only)	108	+	1	ACGTGtc	GADOWNAT
TF_motif_seq_0261	(Motif sequence only)	110	-	0.8	GTGTC	SURECOREATSULTR11
TF_motif_seq_0263	(Motif sequence only)	110	-	0.8	GTGTC	SORLIP1AT
TF_motif_seq_0246	Homeodomain;TALE	111	-	1	TGTCA	AT1G23380;AT1G62360;AT1G70510;AT4G08150
TF_motif_seq_0271	bZIP	111	-	0.8	TGTCA	AT1G77920;AT3G12250;AT5G06950;AT5G06960;AT5G10030;AT5G65210;AT1G22070
TF_motif_seq_0275	(Motif sequence only)	112	-	0.8	GTCAT	WBOXATNPR1
TF_motif_seq_0249	(Motif sequence only)	114	-	0.8	CATGT	ABRELATERD1
TF_motif_seq_0302	bHLH	120	+	1	CAGTTg	AT5G08130;AT3G26744
TF_motif_seq_0302	bHLH	120	-	1	cAGTTG	AT5G08130;AT3G26744
TF_motif_seq_0313	(Others)	120	+	1	CAGTTg	D14712
TF_motif_seq_0248	(Motif sequence only)	120	-	0.8	CAGTT	MYBCOREATCYCB1
TF_motif_seq_0342	(Motif sequence only)	120	-	1	CAGTTg	MYB2CONSENSUSAT
TF_motif_seq_0267	Trihelix	122	+	0.8	GTTGC	AT5G01380
TF_motif_seq_0263	(Motif sequence only)	122	-	0.8	GTTGC	SORLIP1AT
TF_motif_seq_0267	Trihelix	125	-	0.8	GCAAC	AT5G01380
TF_motif_seq_0263	(Motif sequence only)	125	+	0.8	GCAAC	SORLIP1AT
TF_motif_seq_0302	bHLH	126	+	1	CAACTg	AT5G08130;AT3G26744
TF_motif_seq_0302	bHLH	126	-	1	cAACTG	AT5G08130;AT3G26744
TF_motif_seq_0313	(Others)	126	-	1	cAACTG	D14712
TF_motif_seq_0342	(Motif sequence only)	126	+	1	cAACTG	MYB2CONSENSUSAT
TF_motif_seq_0248	(Motif sequence only)	127	+	0.8	AACTG	MYBCOREATCYCB1
TF_motif_seq_0254	AP2;ERF	134	-	0.8	TAGTT	AT3G14230
TFmatrixID_0522	SBP	139	+	0.94	tgttcaGTACGttgct	AT1G69170;AT2G33810;AT2G42200;AT2G47070;AT3G57920;AT5G50570;AT5G50670
TFmatrixID_0401	SBP	141	+	0.91	ttcaGTACGttg	AT1G27360;AT1G27370;AT1G69170;AT2G42200;AT3G57920;AT5G43270
TFmatrixID_0403	SBP	142	-	0.99	tcaGTACGtt	AT1G27370;AT1G69170;AT1G76580;AT2G42200;AT2G47070;AT3G57920;AT5G43270;AT5G50570;AT5G50670
TFmatrixID_0611	SBP	142	-	0.8	tcaGTACGtt	AT2G47070
TFmatrixID_0404	SBP	143	+	0.97	caGTACGtt	AT1G69170;AT2G42200;AT2G47070;AT3G15270
TFmatrixID_0410	SBP	143	+	0.99	caGTACGtt	AT1G27370;AT1G69170;AT2G42200;AT2G47070;AT3G57920;AT5G43270;AT5G50570;AT5G50670
TFmatrixID_0402	SBP	144	+	0.99	aGTACGttg	AT1G53160;AT1G69170;AT2G47070;AT3G57920
TFmatrixID_0405	SBP	144	+	0.98	aGTACGtt	AT1G69170;AT2G42200;AT2G47070;AT3G57920;AT3G60030;AT5G43270;AT5G50570;AT5G50670
TFmatrixID_0406	SBP	144	+	0.98	aGTACGttg	AT5G18830
TF_motif_seq_0244	SBP	144	-	1	AGTAC	AT2G33810;AT2G47070
TF_motif_seq_0244	SBP	145	+	1	GTACG	AT2G33810;AT2G47070
TF_motif_seq_0240	bZIP	146	-	1	TACGT	AT3G54620;AT4G02640
TF_motif_seq_0249	(Motif sequence only)	146	-	0.8	TACGT	ABRELATERD1
TF_motif_seq_0240	bZIP	147	+	1	ACGTT	AT3G54620;AT4G02640
TF_motif_seq_0248	(Motif sequence only)	147	-	0.8	ACGTT	MYBCOREATCYCB1
TF_motif_seq_0249	(Motif sequence only)	147	+	0.8	ACGTT	ABRELATERD1
TF_motif_seq_0267	Trihelix	149	+	0.8	GTTGC	AT5G01380
TF_motif_seq_0263	(Motif sequence only)	149	-	0.8	GTTGC	SORLIP1AT
TFmatrixID_0262	GATA	152	+	1	gcTGATCaa	AT3G06740;AT3G16870;AT4G16141;AT4G26150;AT5G26930;AT5G49300;AT5G56860
TFmatrixID_0262	GATA	153	-	1	ctGATCAac	AT3G06740;AT3G16870;AT4G16141;AT4G26150;AT5G26930;AT5G49300;AT5G56860
TF_motif_seq_0237	GATA;tify	154	+	1	TGATC	AT1G51600;AT2G45050;AT3G06740;AT3G16870;AT3G21175;AT3G24050;AT3G54810;AT3G60530;AT4G17570;AT4G24470;AT4G26150;AT4G32890;AT4G34680;AT5G25830;AT5G26930;AT5G56860;AT5G66320;AT2G18380;AT3G50870;AT4G36620
TF_motif_seq_0237	GATA;tify	155	-	1	GATCA	AT1G51600;AT2G45050;AT3G06740;AT3G16870;AT3G21175;AT3G24050;AT3G54810;AT3G60530;AT4G17570;AT4G24470;AT4G26150;AT4G32890;AT4G34680;AT5G25830;AT5G26930;AT5G56860;AT5G66320;AT2G18380;AT3G50870;AT4G36620
TF_motif_seq_0254	AP2;ERF	156	+	0.8	ATCAA	AT3G14230
TF_motif_seq_0275	(Motif sequence only)	156	-	0.8	ATCAA	WBOXATNPR1
TF_motif_seq_0239	Dof	160	-	1	ACCTT	AT1G29160;AT1G64620;AT2G37590;AT3G21270;AT3G45610;AT3G47500;AT4G38000;AT5G39660;AT5G60200;AT5G60850;AT5G62940;AT2G46590;AT1G07640;AT1G21340;AT1G26790;AT1G47655;AT1G51700;AT1G69570;AT2G28510;AT2G28810;AT2G34140;AT3G50410;AT3G55370;AT3G61850;AT4G00940;AT4G21050;AT4G21080;AT4G24060;AT5G02460;AT5G62430;AT5G65590;AT5G66940
TFmatrixID_0503	MADS box;MIKC	161	-	0.88	cctTTTCTtttttaaagttga	AT4G22950;AT5G10140;AT5G65050;AT5G65060;AT5G65070;AT5G65080;AT1G77080;AT2G45650;AT3G57390;AT4G11880
TF_motif_seq_0239	Dof	161	-	1	CCTTT	AT1G29160;AT1G64620;AT2G37590;AT3G21270;AT3G45610;AT3G47500;AT4G38000;AT5G39660;AT5G60200;AT5G60850;AT5G62940;AT2G46590;AT1G07640;AT1G21340;AT1G26790;AT1G47655;AT1G51700;AT1G69570;AT2G28510;AT2G28810;AT2G34140;AT3G50410;AT3G55370;AT3G61850;AT4G00940;AT4G21050;AT4G21080;AT4G24060;AT5G02460;AT5G62430;AT5G65590;AT5G66940
TF_motif_seq_0248	(Motif sequence only)	161	-	0.8	CCTTT	MYBCOREATCYCB1
TF_motif_seq_0239	Dof	166	-	1	TCTTT	AT1G29160;AT1G64620;AT2G37590;AT3G21270;AT3G45610;AT3G47500;AT4G38000;AT5G39660;AT5G60200;AT5G60850;AT5G62940;AT2G46590;AT1G07640;AT1G21340;AT1G26790;AT1G47655;AT1G51700;AT1G69570;AT2G28510;AT2G28810;AT2G34140;AT3G50410;AT3G55370;AT3G61850;AT4G00940;AT4G21050;AT4G21080;AT4G24060;AT5G02460;AT5G62430;AT5G65590;AT5G66940
TFmatrixID_0570	TBP	169	-	0.95	tTTTTAaagt	AT1G55520;AT3G13445
TFmatrixID_0238	Dof	170	+	1	tttTAAAGt	AT4G38000
TF_motif_seq_0239	Dof	174	+	1	AAAGT	AT1G29160;AT1G64620;AT2G37590;AT3G21270;AT3G45610;AT3G47500;AT4G38000;AT5G39660;AT5G60200;AT5G60850;AT5G62940;AT2G46590;AT1G07640;AT1G21340;AT1G26790;AT1G47655;AT1G51700;AT1G69570;AT2G28510;AT2G28810;AT2G34140;AT3G50410;AT3G55370;AT3G61850;AT4G00940;AT4G21050;AT4G21080;AT4G24060;AT5G02460;AT5G62430;AT5G65590;AT5G66940
TF_motif_seq_0254	AP2;ERF	178	-	0.8	TTGAT	AT3G14230
TF_motif_seq_0275	(Motif sequence only)	178	+	0.8	TTGAT	WBOXATNPR1
TF_motif_seq_0237	GATA;tify	179	+	1	TGATA	AT1G51600;AT2G45050;AT3G06740;AT3G16870;AT3G21175;AT3G24050;AT3G54810;AT3G60530;AT4G17570;AT4G24470;AT4G26150;AT4G32890;AT4G34680;AT5G25830;AT5G26930;AT5G56860;AT5G66320;AT2G18380;AT3G50870;AT4G36620
TF_motif_seq_0243	GATA;tify	180	+	1	GATAG	AT1G51600;AT2G45050;AT3G06740;AT3G16870;AT3G21175;AT3G24050;AT3G54810;AT3G60530;AT4G17570;AT4G24470;AT4G26150;AT4G32890;AT4G34680;AT5G25830;AT5G26930;AT5G56860;AT5G66320;AT2G18380;AT3G50870;AT4G36620
TF_motif_seq_0254	AP2;ERF	182	-	1	TAGAT	AT3G14230
TF_motif_seq_0237	GATA;tify	183	+	1	AGATA	AT1G51600;AT2G45050;AT3G06740;AT3G16870;AT3G21175;AT3G24050;AT3G54810;AT3G60530;AT4G17570;AT4G24470;AT4G26150;AT4G32890;AT4G34680;AT5G25830;AT5G26930;AT5G56860;AT5G66320;AT2G18380;AT3G50870;AT4G36620
TFmatrixID_0571	TBP	184	+	0.97	gATAAAta	AT1G55520;AT3G13445
TF_motif_seq_0243	GATA;tify	184	+	1	GATAA	AT1G51600;AT2G45050;AT3G06740;AT3G16870;AT3G21175;AT3G24050;AT3G54810;AT3G60530;AT4G17570;AT4G24470;AT4G26150;AT4G32890;AT4G34680;AT5G25830;AT5G26930;AT5G56860;AT5G66320;AT2G18380;AT3G50870;AT4G36620
TF_motif_seq_0236	(Motif sequence only)	184	+	0.61	GATAAatataataataaaccgaacaaaatttaa	CGF1ATCAB2
TF_motif_seq_0321	(Motif sequence only)	184	+	1	GATAAa	GT1CONSENSUS
TF_motif_seq_0254	AP2;ERF	186	-	0.8	TAAAT	AT3G14230
TF_motif_seq_0444	Homeodomain;HD-ZIP	186	+	0.86	TAAATata	AT4G21750;AT4G04890
TF_motif_seq_0445	(Motif sequence only)	186	+	0.86	TAAATata	L1BOXATPDF1
TFmatrixID_0004	AT-Hook	187	+	0.9	aAATATaata	AT4G14465
TFmatrixID_0006	AT-Hook	187	-	0.96	aaatATAATa	AT4G14465
TFmatrixID_0008	AT-Hook	187	+	0.95	aAATATaata	AT4G35390
TFmatrixID_0146	AT-Hook	187	+	1	aaatATAAT	AT4G21895;AT5G62260
TFmatrixID_0130	AT-Hook	188	+	0.98	aATATAataa	AT1G19485;AT1G48610;AT4G17950
TF_motif_seq_0254	AP2;ERF	189	+	0.8	ATATA	AT3G14230
TFmatrixID_0006	AT-Hook	190	-	0.96	tataATAATa	AT4G14465
TF_motif_seq_0241	ZF-HD	191	-	1	ATAAT	AT1G75240
TFmatrixID_0131	AT-Hook	193	+	1	aataATAAA	AT1G19485;AT1G48610
TFmatrixID_0136	AT-Hook	194	+	1	ataATAAA	AT4G21895;AT5G62260
TF_motif_seq_0241	ZF-HD	194	-	1	ATAAT	AT1G75240
TF_motif_seq_0248	(Motif sequence only)	200	+	0.8	AACCG	MYBCOREATCYCB1
TF_motif_seq_0508	SBP	201	+	0.75	acCGAACaa	AT1G20980;AT1G27360;AT1G27370;AT1G53160;AT1G69170;AT1G76580;AT2G33810;AT2G42200;AT2G47070;AT3G15270;AT3G57920;AT3G60030;AT5G18830;AT5G43270
TF_motif_seq_0258	Dehydrin	202	+	0.8	CCGAA	U01377
TFmatrixID_0223	TCR;CPP	207	+	0.99	caaAATTTaaaag	AT4G14770
TFmatrixID_0225	TCR	210	+	0.96	aatTTAAAag	AT3G04850
TFmatrixID_0225	TCR	210	-	0.96	aaTTTAAaag	AT3G04850
TFmatrixID_0224	TCR;CPP	211	+	0.99	aTTTAAaa	AT2G20110
TFmatrixID_0224	TCR;CPP	211	-	0.99	atTTAAAa	AT2G20110
TF_motif_seq_0254	AP2;ERF	211	+	0.8	ATTTA	AT3G14230
TF_motif_seq_0239	Dof	216	+	1	AAAGA	AT1G29160;AT1G64620;AT2G37590;AT3G21270;AT3G45610;AT3G47500;AT4G38000;AT5G39660;AT5G60200;AT5G60850;AT5G62940;AT2G46590;AT1G07640;AT1G21340;AT1G26790;AT1G47655;AT1G51700;AT1G69570;AT2G28510;AT2G28810;AT2G34140;AT3G50410;AT3G55370;AT3G61850;AT4G00940;AT4G21050;AT4G21080;AT4G24060;AT5G02460;AT5G62430;AT5G65590;AT5G66940
TFmatrixID_0227	TCR;CPP	222	+	0.97	gcTTTGAata	AT4G29000
TF_motif_seq_0239	Dof	222	-	1	GCTTT	AT1G29160;AT1G64620;AT2G37590;AT3G21270;AT3G45610;AT3G47500;AT4G38000;AT5G39660;AT5G60200;AT5G60850;AT5G62940;AT2G46590;AT1G07640;AT1G21340;AT1G26790;AT1G47655;AT1G51700;AT1G69570;AT2G28510;AT2G28810;AT2G34140;AT3G50410;AT3G55370;AT3G61850;AT4G00940;AT4G21050;AT4G21080;AT4G24060;AT5G02460;AT5G62430;AT5G65590;AT5G66940
TFmatrixID_0226	TCR;CPP	223	+	0.99	cTTTGAat	AT3G22760;AT3G22780;AT4G14770
TF_motif_seq_0399	(Motif sequence only)	224	+	0.84	TTTGAat	WBBOXPCWRKY1
TFmatrixID_0131	AT-Hook	225	+	1	ttgaATAAA	AT1G19485;AT1G48610
TF_motif_seq_0275	(Motif sequence only)	225	+	0.8	TTGAA	WBOXATNPR1
TFmatrixID_0223	TCR;CPP	227	-	0.98	gaataAAATTtgc	AT4G14770
TFmatrixID_0148	AT-Hook	229	+	0.99	atAAAATt	AT1G19485;AT1G48610
TF_motif_seq_0257	NF-YB;NF-YA;NF-YC	234	-	0.8	ATTTG	AT1G09030;AT1G17590;AT1G21970;AT1G30500;AT1G54160;AT1G54830;AT1G56170;AT1G72830;AT2G38880;AT2G47810;AT3G05690;AT3G14020;AT3G20910;AT3G53340;AT4G14540;AT5G06510;AT5G12840;AT5G27910;AT5G38140;AT5G47640;AT5G47670;AT5G50470;AT5G50480
TF_motif_seq_0237	GATA;tify	239	+	1	CGATG	AT1G51600;AT2G45050;AT3G06740;AT3G16870;AT3G21175;AT3G24050;AT3G54810;AT3G60530;AT4G17570;AT4G24470;AT4G26150;AT4G32890;AT4G34680;AT5G25830;AT5G26930;AT5G56860;AT5G66320;AT2G18380;AT3G50870;AT4G36620
TF_motif_seq_0249	(Motif sequence only)	241	+	0.8	ATGTG	ABRELATERD1
TF_motif_seq_0275	(Motif sequence only)	243	-	0.8	GTGAA	WBOXATNPR1
TFmatrixID_0288	Homeodomain;HD-ZIP	244	-	0.99	tgaATTAAtgg	AT1G05230;AT1G17920;AT3G61150;AT4G00730;AT5G46880
TFmatrixID_0280	Homeodomain;HD-ZIP	245	+	0.97	gaaTTAATgg	AT1G05230;AT1G17920;AT1G73360;AT1G79840;AT3G03260;AT3G61150;AT5G46880
TFmatrixID_0287	Homeodomain;bZIP;HD-ZIP	245	+	0.94	gaaTTAATgg	AT3G61890
TFmatrixID_0287	Homeodomain;bZIP;HD-ZIP	245	-	0.94	gaATTAAtgg	AT3G61890
TFmatrixID_0290	Homeodomain;HD-ZIP	246	+	0.98	aaTTAATgga	AT1G05230;AT1G17920;AT2G32370;AT3G61150;AT4G21750;AT5G46880
TF_motif_seq_0241	ZF-HD	247	+	1	ATTAA	AT1G75240
TF_motif_seq_0241	ZF-HD	248	-	1	TTAAT	AT1G75240
TF_motif_seq_0396	WOX	248	+	1	TTAATgg	AT2G17950
TF_motif_seq_0257	NF-YB;NF-YA;NF-YC	250	-	0.8	AATGG	AT1G09030;AT1G17590;AT1G21970;AT1G30500;AT1G54160;AT1G54830;AT1G56170;AT1G72830;AT2G38880;AT2G47810;AT3G05690;AT3G14020;AT3G20910;AT3G53340;AT4G14540;AT5G06510;AT5G12840;AT5G27910;AT5G38140;AT5G47640;AT5G47670;AT5G50470;AT5G50480
TF_motif_seq_0248	(Motif sequence only)	250	+	0.8	AATGG	MYBCOREATCYCB1
TFmatrixID_0131	AT-Hook	255	+	1	aggaATAAA	AT1G19485;AT1G48610
TF_motif_seq_0239	Dof	261	+	1	AAAGG	AT1G29160;AT1G64620;AT2G37590;AT3G21270;AT3G45610;AT3G47500;AT4G38000;AT5G39660;AT5G60200;AT5G60850;AT5G62940;AT2G46590;AT1G07640;AT1G21340;AT1G26790;AT1G47655;AT1G51700;AT1G69570;AT2G28510;AT2G28810;AT2G34140;AT3G50410;AT3G55370;AT3G61850;AT4G00940;AT4G21050;AT4G21080;AT4G24060;AT5G02460;AT5G62430;AT5G65590;AT5G66940
TF_motif_seq_0248	(Motif sequence only)	261	+	0.8	AAAGG	MYBCOREATCYCB1
TF_motif_seq_0239	Dof	262	+	1	AAGGG	AT1G29160;AT1G64620;AT2G37590;AT3G21270;AT3G45610;AT3G47500;AT4G38000;AT5G39660;AT5G60200;AT5G60850;AT5G62940;AT2G46590;AT1G07640;AT1G21340;AT1G26790;AT1G47655;AT1G51700;AT1G69570;AT2G28510;AT2G28810;AT2G34140;AT3G50410;AT3G55370;AT3G61850;AT4G00940;AT4G21050;AT4G21080;AT4G24060;AT5G02460;AT5G62430;AT5G65590;AT5G66940
TF_motif_seq_0248	(Motif sequence only)	262	+	0.8	AAGGG	MYBCOREATCYCB1
TF_motif_seq_0434	(Motif sequence only)	266	+	1	GTATAtcc	P1BS
TF_motif_seq_0434	(Motif sequence only)	266	-	1	gtaTATCC	P1BS
TF_motif_seq_0254	AP2;ERF	267	-	0.8	TATAT	AT3G14230
TF_motif_seq_0243	GATA;tify	268	-	1	ATATC	AT1G51600;AT2G45050;AT3G06740;AT3G16870;AT3G21175;AT3G24050;AT3G54810;AT3G60530;AT4G17570;AT4G24470;AT4G26150;AT4G32890;AT4G34680;AT5G25830;AT5G26930;AT5G56860;AT5G66320;AT2G18380;AT3G50870;AT4G36620
TF_motif_seq_0237	GATA;tify	269	-	1	TATCC	AT1G51600;AT2G45050;AT3G06740;AT3G16870;AT3G21175;AT3G24050;AT3G54810;AT3G60530;AT4G17570;AT4G24470;AT4G26150;AT4G32890;AT4G34680;AT5G25830;AT5G26930;AT5G56860;AT5G66320;AT2G18380;AT3G50870;AT4G36620
TF_motif_seq_0009	(Motif sequence only)	271	-	0.7	tcctcGACGT	LS7ATPR1
TF_motif_seq_0258	Dehydrin	274	+	0.8	TCGAC	U01377
TF_motif_seq_0275	(Motif sequence only)	274	+	0.8	TCGAC	WBOXATNPR1
TFmatrixID_0242	Dof	275	-	0.95	cgACGTTaaat	AT5G60850
TFmatrixID_0350	Myb/SANT;MYB	275	+	0.9	cgaCGTTAaat	AT4G18770
TF_motif_seq_0271	bZIP	275	+	0.8	CGACG	AT1G77920;AT3G12250;AT5G06950;AT5G06960;AT5G10030;AT5G65210;AT1G22070
TF_motif_seq_0450	(Motif sequence only)	275	+	0.75	CGACGtta	PALINDROMICCBOXGM
TF_motif_seq_0450	(Motif sequence only)	275	-	0.75	cgaCGTTA	PALINDROMICCBOXGM
TFmatrixID_0241	Dof	276	-	0.94	gaCGTTAaat	AT5G60850
TFmatrixID_0639	Dof	276	+	0.87	gaCGTTAaat	AT5G65590
TF_motif_seq_0240	bZIP	276	-	1	GACGT	AT3G54620;AT4G02640
TF_motif_seq_0249	(Motif sequence only)	276	-	0.8	GACGT	ABRELATERD1
TFmatrixID_0236	Dof	277	-	1	aCGTTAaa	AT3G45610
TF_motif_seq_0240	bZIP	277	+	1	ACGTT	AT3G54620;AT4G02640
TF_motif_seq_0248	(Motif sequence only)	277	-	0.8	ACGTT	MYBCOREATCYCB1
TF_motif_seq_0249	(Motif sequence only)	277	+	0.8	ACGTT	ABRELATERD1
TF_motif_seq_0271	bZIP	278	-	0.8	CGTTA	AT1G77920;AT3G12250;AT5G06950;AT5G06960;AT5G10030;AT5G65210;AT1G22070
TF_motif_seq_0267	Trihelix	279	+	0.8	GTTAA	AT5G01380
TF_motif_seq_0275	(Motif sequence only)	279	-	0.8	GTTAA	WBOXATNPR1
TFmatrixID_0628	Homeodomain;bZIP;HD-ZIP;WOX	280	-	0.95	ttaAATTAat	AT4G35550
TFmatrixID_0288	Homeodomain;HD-ZIP	281	-	0.94	taaATTAAttt	AT1G05230;AT1G17920;AT3G61150;AT4G00730;AT5G46880
TF_motif_seq_0254	AP2;ERF	281	-	0.8	TAAAT	AT3G14230
TFmatrixID_0001	AT-Hook	282	+	1	aAATTAattt	AT1G63480
TFmatrixID_0001	AT-Hook	282	-	1	aaatTAATTt	AT1G63480
TFmatrixID_0005	AT-Hook	282	+	0.94	aaATTAAttt	AT4G14465
TFmatrixID_0005	AT-Hook	282	-	0.94	aaaTTAATtt	AT4G14465
TFmatrixID_0007	AT-Hook	282	+	1	aAATTAattt	AT4G35390
TFmatrixID_0007	AT-Hook	282	-	1	aaatTAATTt	AT4G35390
TFmatrixID_0288	Homeodomain;HD-ZIP	282	+	0.94	aaaTTAATttt	AT1G05230;AT1G17920;AT3G61150;AT4G00730;AT5G46880
TFmatrixID_0569	TBP	282	-	0.97	aaattaatTTTATat	AT1G55520;AT3G13445
TF_motif_seq_0241	ZF-HD	284	+	1	ATTAA	AT1G75240
TF_motif_seq_0241	ZF-HD	285	-	1	TTAAT	AT1G75240
TFmatrixID_0148	AT-Hook	287	-	0.99	aATTTTat	AT1G19485;AT1G48610
TFmatrixID_0585	TBP	287	-	0.97	aatTTTATatt	AT1G55520;AT3G13445
TFmatrixID_0418	TBP	290	-	1	ttTATAT	AT1G55520;AT3G13445
TF_motif_seq_0434	(Motif sequence only)	291	-	0.83	ttaTATTC	P1BS
TF_motif_seq_0254	AP2;ERF	292	-	0.8	TATAT	AT3G14230
TF_motif_seq_0390	(Motif sequence only)	297	+	0.86	TCATCcc	ANAERO3CONSENSUS
TF_motif_seq_0237	GATA;tify	298	-	1	CATCC	AT1G51600;AT2G45050;AT3G06740;AT3G16870;AT3G21175;AT3G24050;AT3G54810;AT3G60530;AT4G17570;AT4G24470;AT4G26150;AT4G32890;AT4G34680;AT5G25830;AT5G26930;AT5G56860;AT5G66320;AT2G18380;AT3G50870;AT4G36620
TF_motif_seq_0267	Trihelix	303	-	0.8	CTAAC	AT5G01380
TF_motif_seq_0366	(Motif sequence only)	303	+	0.86	CTAACaa	MYBATRD22
TF_motif_seq_0377	(Motif sequence only)	304	+	1	TAACAaa	GAREAT
TF_motif_seq_0239	Dof	310	-	1	ACTTT	AT1G29160;AT1G64620;AT2G37590;AT3G21270;AT3G45610;AT3G47500;AT4G38000;AT5G39660;AT5G60200;AT5G60850;AT5G62940;AT2G46590;AT1G07640;AT1G21340;AT1G26790;AT1G47655;AT1G51700;AT1G69570;AT2G28510;AT2G28810;AT2G34140;AT3G50410;AT3G55370;AT3G61850;AT4G00940;AT4G21050;AT4G21080;AT4G24060;AT5G02460;AT5G62430;AT5G65590;AT5G66940
TF_motif_seq_0275	(Motif sequence only)	313	-	0.8	TTCAA	WBOXATNPR1
TF_motif_seq_0275	(Motif sequence only)	318	-	0.8	CTCAA	WBOXATNPR1
TFmatrixID_0233	Dof	320	-	1	caaCTTTTga	AT1G64620
TFmatrixID_0235	Dof	322	-	1	aCTTTTga	AT3G21270
TF_motif_seq_0239	Dof	322	-	1	ACTTT	AT1G29160;AT1G64620;AT2G37590;AT3G21270;AT3G45610;AT3G47500;AT4G38000;AT5G39660;AT5G60200;AT5G60850;AT5G62940;AT2G46590;AT1G07640;AT1G21340;AT1G26790;AT1G47655;AT1G51700;AT1G69570;AT2G28510;AT2G28810;AT2G34140;AT3G50410;AT3G55370;AT3G61850;AT4G00940;AT4G21050;AT4G21080;AT4G24060;AT5G02460;AT5G62430;AT5G65590;AT5G66940
TF_motif_seq_0254	AP2;ERF	326	-	0.8	TTGAT	AT3G14230
TF_motif_seq_0275	(Motif sequence only)	326	+	0.8	TTGAT	WBOXATNPR1
TF_motif_seq_0237	GATA;tify	327	+	1	TGATA	AT1G51600;AT2G45050;AT3G06740;AT3G16870;AT3G21175;AT3G24050;AT3G54810;AT3G60530;AT4G17570;AT4G24470;AT4G26150;AT4G32890;AT4G34680;AT5G25830;AT5G26930;AT5G56860;AT5G66320;AT2G18380;AT3G50870;AT4G36620
TF_motif_seq_0243	GATA;tify	328	+	1	GATAG	AT1G51600;AT2G45050;AT3G06740;AT3G16870;AT3G21175;AT3G24050;AT3G54810;AT3G60530;AT4G17570;AT4G24470;AT4G26150;AT4G32890;AT4G34680;AT5G25830;AT5G26930;AT5G56860;AT5G66320;AT2G18380;AT3G50870;AT4G36620
TF_motif_seq_0254	AP2;ERF	330	-	0.8	TAGTT	AT3G14230
TF_motif_seq_0254	AP2;ERF	333	+	0.8	TTCTA	AT3G14230
TF_motif_seq_0267	Trihelix	335	-	0.8	CTAAC	AT5G01380
TF_motif_seq_0366	(Motif sequence only)	335	+	0.86	CTAACaa	MYBATRD22
TF_motif_seq_0377	(Motif sequence only)	336	+	0.96	TAACAat	GAREAT
TF_motif_seq_0257	NF-YB;NF-YA;NF-YC	338	+	0.8	ACAAT	AT1G09030;AT1G17590;AT1G21970;AT1G30500;AT1G54160;AT1G54830;AT1G56170;AT1G72830;AT2G38880;AT2G47810;AT3G05690;AT3G14020;AT3G20910;AT3G53340;AT4G14540;AT5G06510;AT5G12840;AT5G27910;AT5G38140;AT5G47640;AT5G47670;AT5G50470;AT5G50480
TFmatrixID_0004	AT-Hook	339	+	0.99	cAATATattt	AT4G14465
TFmatrixID_0004	AT-Hook	339	-	1	caatATATTt	AT4G14465
TFmatrixID_0008	AT-Hook	339	+	0.99	cAATATattt	AT4G35390
TFmatrixID_0008	AT-Hook	339	-	0.99	caatATATTt	AT4G35390
TFmatrixID_0130	AT-Hook	340	+	0.94	aATATAtttc	AT1G19485;AT1G48610;AT4G17950
TFmatrixID_0419	TBP	340	+	1	aaTATAT	AT1G55520;AT3G13445
TFmatrixID_0419	TBP	341	-	1	ATATAtt	AT1G55520;AT3G13445
TF_motif_seq_0254	AP2;ERF	341	+	0.8	ATATA	AT3G14230
TF_motif_seq_0254	AP2;ERF	342	-	0.8	TATAT	AT3G14230
TFmatrixID_0280	Homeodomain;HD-ZIP	348	-	0.98	tcATTAAatt	AT1G05230;AT1G17920;AT1G73360;AT1G79840;AT3G03260;AT3G61150;AT5G46880
TF_motif_seq_0027	(Motif sequence only)	349	+	1	CATTAaattg	CARGCW8GAT
TF_motif_seq_0027	(Motif sequence only)	349	-	1	cattaAATTG	CARGCW8GAT
TF_motif_seq_0241	ZF-HD	350	+	1	ATTAA	AT1G75240
TF_motif_seq_0254	AP2;ERF	352	-	0.8	TAAAT	AT3G14230
TF_motif_seq_0257	NF-YB;NF-YA;NF-YC	355	-	0.8	ATTGA	AT1G09030;AT1G17590;AT1G21970;AT1G30500;AT1G54160;AT1G54830;AT1G56170;AT1G72830;AT2G38880;AT2G47810;AT3G05690;AT3G14020;AT3G20910;AT3G53340;AT4G14540;AT5G06510;AT5G12840;AT5G27910;AT5G38140;AT5G47640;AT5G47670;AT5G50470;AT5G50480
TF_motif_seq_0339	WRKY	356	+	0.95	TTGACa	AT1G13960;AT1G18860;AT1G29280;AT1G29860;AT1G30650;AT1G55600;AT1G62300;AT1G64000;AT1G66550;AT1G68150;AT1G69310;AT1G69810;AT1G80590;AT1G80840;AT2G03340;AT2G23320;AT2G24570;AT2G25000;AT2G30250;AT2G30590;AT2G34830;AT2G37260;AT2G38470;AT2G40740;AT2G40750;AT2G44745;AT2G46130;AT2G46400;AT2G47260;AT3G01080;AT3G01970;AT3G04670;AT3G56400;AT3G58710;AT4G01250;AT4G01720;AT4G04450;AT4G12020;AT4G18170;AT4G22070…
TF_motif_seq_0275	(Motif sequence only)	356	+	1	TTGAC	WBOXATNPR1
TF_motif_seq_0246	Homeodomain;TALE	357	+	1	TGACA	AT1G23380;AT1G62360;AT1G70510;AT4G08150
TF_motif_seq_0271	bZIP	357	+	0.8	TGACA	AT1G77920;AT3G12250;AT5G06950;AT5G06960;AT5G10030;AT5G65210;AT1G22070
TF_motif_seq_0275	(Motif sequence only)	358	-	0.8	GACAA	WBOXATNPR1
TFmatrixID_0223	TCR;CPP	360	+	0.97	caaAATTTaattc	AT4G14770
TFmatrixID_0005	AT-Hook	363	-	0.97	aatTTAATtc	AT4G14465
TFmatrixID_0007	AT-Hook	363	-	0.97	aattTAATTc	AT4G35390
TF_motif_seq_0254	AP2;ERF	364	+	0.8	ATTTA	AT3G14230
TF_motif_seq_0241	ZF-HD	366	-	1	TTAAT	AT1G75240
TF_motif_seq_0257	NF-YB;NF-YA;NF-YC	369	-	0.8	ATTCG	AT1G09030;AT1G17590;AT1G21970;AT1G30500;AT1G54160;AT1G54830;AT1G56170;AT1G72830;AT2G38880;AT2G47810;AT3G05690;AT3G14020;AT3G20910;AT3G53340;AT4G14540;AT5G06510;AT5G12840;AT5G27910;AT5G38140;AT5G47640;AT5G47670;AT5G50470;AT5G50480
TF_motif_seq_0254	AP2;ERF	371	-	0.8	TCGAT	AT3G14230
TF_motif_seq_0237	GATA;tify	372	+	1	CGATT	AT1G51600;AT2G45050;AT3G06740;AT3G16870;AT3G21175;AT3G24050;AT3G54810;AT3G60530;AT4G17570;AT4G24470;AT4G26150;AT4G32890;AT4G34680;AT5G25830;AT5G26930;AT5G56860;AT5G66320;AT2G18380;AT3G50870;AT4G36620
TF_motif_seq_0268	(Motif sequence only)	372	+	1	CGATT	ARR1AT
TF_motif_seq_0257	NF-YB;NF-YA;NF-YC	374	-	0.8	ATTTG	AT1G09030;AT1G17590;AT1G21970;AT1G30500;AT1G54160;AT1G54830;AT1G56170;AT1G72830;AT2G38880;AT2G47810;AT3G05690;AT3G14020;AT3G20910;AT3G53340;AT4G14540;AT5G06510;AT5G12840;AT5G27910;AT5G38140;AT5G47640;AT5G47670;AT5G50470;AT5G50480
TF_motif_seq_0241	ZF-HD	378	-	1	GTAAT	AT1G75240
TF_motif_seq_0267	Trihelix	378	-	0.8	GTAAT	AT5G01380
TF_motif_seq_0254	AP2;ERF	382	-	1	TAGAT	AT3G14230
TF_motif_seq_0237	GATA;tify	383	+	1	AGATT	AT1G51600;AT2G45050;AT3G06740;AT3G16870;AT3G21175;AT3G24050;AT3G54810;AT3G60530;AT4G17570;AT4G24470;AT4G26150;AT4G32890;AT4G34680;AT5G25830;AT5G26930;AT5G56860;AT5G66320;AT2G18380;AT3G50870;AT4G36620
TF_motif_seq_0252	Myb/SANT;MYB;ARR-B	383	+	1	AGATT	AT2G01760;AT3G16857;AT4G16110;AT4G18020;AT4G31920;AT5G58080;AT1G67710;AT1G49190;AT2G25180;AT5G49240
TF_motif_seq_0268	(Motif sequence only)	383	+	1	AGATT	ARR1AT
TF_motif_seq_0363	(Motif sequence only)	383	-	0.86	agATTGG	LEAFYATAG
TF_motif_seq_0257	NF-YB;NF-YA;NF-YC	385	-	1	ATTGG	AT1G09030;AT1G17590;AT1G21970;AT1G30500;AT1G54160;AT1G54830;AT1G56170;AT1G72830;AT2G38880;AT2G47810;AT3G05690;AT3G14020;AT3G20910;AT3G53340;AT4G14540;AT5G06510;AT5G12840;AT5G27910;AT5G38140;AT5G47640;AT5G47670;AT5G50470;AT5G50480
TF_motif_seq_0275	(Motif sequence only)	387	+	0.8	TGGAC	WBOXATNPR1
TF_motif_seq_0450	(Motif sequence only)	388	-	0.75	ggaCTTCA	PALINDROMICCBOXGM
TF_motif_seq_0009	(Motif sequence only)	390	+	0.8	ACTTCataaa	LS7ATPR1
TF_motif_seq_0271	bZIP	391	-	0.8	CTTCA	AT1G77920;AT3G12250;AT5G06950;AT5G06960;AT5G10030;AT5G65210;AT1G22070
TF_motif_seq_0254	AP2;ERF	396	-	0.8	TAAAT	AT3G14230
TF_motif_seq_0237	GATA;tify	400	+	1	TGATA	AT1G51600;AT2G45050;AT3G06740;AT3G16870;AT3G21175;AT3G24050;AT3G54810;AT3G60530;AT4G17570;AT4G24470;AT4G26150;AT4G32890;AT4G34680;AT5G25830;AT5G26930;AT5G56860;AT5G66320;AT2G18380;AT3G50870;AT4G36620
TF_motif_seq_0243	GATA;tify	401	+	1	GATAA	AT1G51600;AT2G45050;AT3G06740;AT3G16870;AT3G21175;AT3G24050;AT3G54810;AT3G60530;AT4G17570;AT4G24470;AT4G26150;AT4G32890;AT4G34680;AT5G25830;AT5G26930;AT5G56860;AT5G66320;AT2G18380;AT3G50870;AT4G36620
TF_motif_seq_0321	(Motif sequence only)	401	+	1	GATAAt	GT1CONSENSUS
TF_motif_seq_0241	ZF-HD	402	-	1	ATAAT	AT1G75240
TF_motif_seq_0237	GATA;tify	404	-	1	AATCA	AT1G51600;AT2G45050;AT3G06740;AT3G16870;AT3G21175;AT3G24050;AT3G54810;AT3G60530;AT4G17570;AT4G24470;AT4G26150;AT4G32890;AT4G34680;AT5G25830;AT5G26930;AT5G56860;AT5G66320;AT2G18380;AT3G50870;AT4G36620
TF_motif_seq_0268	(Motif sequence only)	404	-	1	AATCA	ARR1AT
TF_motif_seq_0254	AP2;ERF	405	+	0.8	ATCAA	AT3G14230
TF_motif_seq_0275	(Motif sequence only)	405	-	0.8	ATCAA	WBOXATNPR1
TF_motif_seq_0300	bHLH	407	+	0.83	CAAGTg	AT1G09530;AT2G20180;AT4G17880;AT5G46760
TF_motif_seq_0300	bHLH	407	-	0.83	cAAGTG	AT1G09530;AT2G20180;AT4G17880;AT5G46760
TF_motif_seq_0301	bHLH	407	-	1	cAAGTG	AT1G32640
TF_motif_seq_0302	bHLH	407	+	1	CAAGTg	AT5G08130;AT3G26744
TF_motif_seq_0302	bHLH	407	-	1	cAAGTG	AT5G08130;AT3G26744
TF_motif_seq_0249	(Motif sequence only)	407	-	0.8	CAAGT	ABRELATERD1
TF_motif_seq_0249	(Motif sequence only)	408	+	0.8	AAGTG	ABRELATERD1
TF_motif_seq_0237	GATA;tify	411	+	1	TGATT	AT1G51600;AT2G45050;AT3G06740;AT3G16870;AT3G21175;AT3G24050;AT3G54810;AT3G60530;AT4G17570;AT4G24470;AT4G26150;AT4G32890;AT4G34680;AT5G25830;AT5G26930;AT5G56860;AT5G66320;AT2G18380;AT3G50870;AT4G36620
TF_motif_seq_0268	(Motif sequence only)	411	+	1	TGATT	ARR1AT
TF_motif_seq_0261	(Motif sequence only)	414	-	0.8	TTCTC	SURECOREATSULTR11
TF_motif_seq_0067	HB-PHD	419	+	0.73	CTAATgctttt	AT4G29940
TF_motif_seq_0241	ZF-HD	419	-	1	CTAAT	AT1G75240
TF_motif_seq_0257	NF-YB;NF-YA;NF-YC	419	+	0.8	CTAAT	AT1G09030;AT1G17590;AT1G21970;AT1G30500;AT1G54160;AT1G54830;AT1G56170;AT1G72830;AT2G38880;AT2G47810;AT3G05690;AT3G14020;AT3G20910;AT3G53340;AT4G14540;AT5G06510;AT5G12840;AT5G27910;AT5G38140;AT5G47640;AT5G47670;AT5G50470;AT5G50480
TFmatrixID_0239	Dof	422	-	0.99	atgCTTTTtt	AT5G39660
TFmatrixID_0234	Dof	424	-	1	gCTTTTt	AT2G37590
TF_motif_seq_0239	Dof	424	-	1	GCTTT	AT1G29160;AT1G64620;AT2G37590;AT3G21270;AT3G45610;AT3G47500;AT4G38000;AT5G39660;AT5G60200;AT5G60850;AT5G62940;AT2G46590;AT1G07640;AT1G21340;AT1G26790;AT1G47655;AT1G51700;AT1G69570;AT2G28510;AT2G28810;AT2G34140;AT3G50410;AT3G55370;AT3G61850;AT4G00940;AT4G21050;AT4G21080;AT4G24060;AT5G02460;AT5G62430;AT5G65590;AT5G66940
TFmatrixID_0134	AT-Hook	427	-	0.98	TTTTTtcttc	AT4G21895;AT5G62260
TF_motif_seq_0321	(Motif sequence only)	428	-	1	tTTTTC	GT1CONSENSUS

## Sheet: Figure4 _region_all_scores
Matrix ID	Family	Position	Strand	Similar Score	Hit Sequence	TF ID or Motif name
TF_motif_seq_0275	(Motif sequence only)	51	-	0.8	GTGAA	WBOXATNPR1
TFmatrixID_0300	Homeodomain;TALE	55	-	0.96	aggCGTCAtg	AT1G62360;AT1G70510;AT4G08150
TF_motif_seq_0246	Homeodomain;TALE	58	-	1	CGTCA	AT1G23380;AT1G62360;AT1G70510;AT4G08150
TF_motif_seq_0275	(Motif sequence only)	59	-	0.8	GTCAT	WBOXATNPR1
TFmatrixID_0289	Homeodomain;HD-ZIP	63	-	0.97	tgAATCAtgc	AT2G22800;AT4G16780;AT4G17460;AT4G37790;AT5G06710;AT5G47370
TF_motif_seq_0241	ZF-HD	87	+	1	ATTAA	AT1G75240
TF_motif_seq_0444	Homeodomain;HD-ZIP	89	+	0.97	TAAATgaa	AT4G21750;AT4G04890
TFmatrixID_0585	TBP	96	+	0.98	aatATAAAatc	AT1G55520;AT3G13445
TFmatrixID_0418	TBP	97	+	1	ATATAaa	AT1G55520;AT3G13445
TFmatrixID_0569	TBP	97	+	0.98	atATAAAatccacgt	AT1G55520;AT3G13445
TFmatrixID_0111	bHLH	101	-	0.9	aaaatccACGTGtcatgt	AT1G09530
TFmatrixID_0112	bHLH	101	-	0.9	aaaatccACGTGtcatg	AT1G09530
TFmatrixID_0558	bHLH	101	-	0.9	aaaatccACGTGtcatgt	AT1G09530;AT2G46970;AT4G28790;AT4G28800;AT4G28811;AT4G28815;AT5G61270;AT5G67110
TFmatrixID_0559	bHLH	101	-	0.9	aaaatccACGTGtcatg	AT1G09530;AT2G46970;AT4G28790;AT4G28800;AT4G28811;AT4G28815;AT5G61270;AT5G67110
TFmatrixID_0163	bHLH	103	-	0.94	aatcCACGTgtc	AT1G10120;AT1G18400;AT1G25330;AT1G26260;AT1G68920;AT1G73830;AT2G18300;AT3G07340;AT3G23690;AT4G34530;AT5G50915;AT5G62610
TFmatrixID_0173	bHLH	103	-	1	aatcCACGTg	AT2G46510;AT4G09820;AT4G16430;AT5G46760;AT5G46830
TFmatrixID_0495	BES1	103	-	0.97	aatccACGTGtcat	AT1G75080
TFmatrixID_0160	bHLH	105	-	1	tccACGTGtc	AT1G32640;AT2G46510;AT4G09820;AT4G16430;AT5G46830
TFmatrixID_0162	bHLH	105	-	0.99	tccACGTGtc	AT1G69010
TFmatrixID_0164	bHLH	105	-	1	tccACGTGtc	AT2G20180;AT2G46970;AT4G28790;AT4G28800;AT4G28811;AT4G28815;AT5G67110
TFmatrixID_0168	bHLH	105	-	1	tccACGTGtc	AT2G46510;AT4G16430;AT4G17880;AT5G46830
TFmatrixID_0169	bHLH	105	-	1	tccACGTGtc	AT1G10120;AT1G18400;AT1G25330;AT1G26260;AT1G68920;AT1G73830;AT3G07340;AT3G23690;AT4G34530;AT4G36540;AT5G50915;AT5G62610
TFmatrixID_0170	bHLH	105	-	1	tcCACGTgt	AT4G28790;AT4G28800;AT4G28811;AT4G28815;AT4G36930;AT5G67110
TFmatrixID_0172	bHLH	105	-	0.99	tccACGTGtc	AT5G38860
TFmatrixID_0175	bHLH	105	-	1	tccACGTGtc	AT1G51070;AT5G54680
TFmatrixID_0177	bHLH	105	-	1	tccACGTGtc	AT1G03040;AT2G24260;AT3G07340;AT4G02590;AT4G28811;AT4G30980;AT4G34530;AT5G58010
TFmatrixID_0494	BES1	105	-	0.97	tcCACGTgtca	AT1G19350
TFmatrixID_0157	bHLH	106	-	0.99	cCACGTg	AT2G46510;AT4G09820;AT4G16430;AT5G46830
TFmatrixID_0158	bHLH	106	-	1	ccACGTGt	AT1G01260;AT1G12860;AT2G46510;AT4G16430;AT5G46830;AT5G57150
TFmatrixID_0159	bHLH	106	-	1	cCACGTg	AT1G09530;AT2G46970;AT4G28790;AT4G28800;AT4G28811;AT4G28815;AT5G61270;AT5G67110
TFmatrixID_0161	bHLH	106	-	1	cCACGTgtc	AT1G10120;AT1G18400;AT1G25330;AT1G26260;AT1G59640;AT1G68920;AT1G73830;AT3G07340;AT3G23690;AT4G34530;AT5G50915;AT5G62610
TFmatrixID_0166	bHLH	106	-	0.98	ccACGTGt	AT4G00050;AT4G28790;AT4G28811;AT5G61270;AT5G67110
TFmatrixID_0171	bHLH	106	-	1	ccACGTGtca	AT5G08130
TFmatrixID_0174	bHLH	106	-	0.75	ccaCGTGT	AT1G10120;AT1G18400;AT1G25330;AT1G26260;AT1G68920;AT1G73830;AT2G24260;AT3G07340;AT3G23690;AT4G30980;AT4G34530;AT5G48560;AT5G50915;AT5G58010;AT5G62610
TFmatrixID_0179	bHLH	106	-	0.97	ccACGTGt	AT1G10120;AT1G18400;AT1G25330;AT1G26260;AT1G68920;AT1G73830;AT2G24260;AT3G07340;AT3G23690;AT4G30980;AT4G34530;AT5G50915;AT5G58010;AT5G62610
TFmatrixID_0597	bHLH	105	-	0.88	tccACGTGtc	AT1G09530
TFmatrixID_0497	bHLH	106	-	0.99	cCACGTgtcatgtt	AT2G20180;AT2G46970;AT4G28790;AT4G28800;AT4G28811;AT4G28815;AT5G67110
TFmatrixID_0505	bHLH	106	-	0.94	ccACGTGtca	AT1G09530;AT2G46970;AT4G28790;AT4G28800;AT4G28811;AT4G28815;AT5G61270;AT5G67110
TFmatrixID_0511	bHLH	106	-	0.95	ccACGTGt	AT1G32640;AT2G46510;AT4G09820;AT4G16430;AT5G46830
TFmatrixID_0513	bHLH	106	-	0.99	ccACGTGt	AT2G46510;AT4G09820;AT4G16430;AT5G46760;AT5G46830
TFmatrixID_0514	bHLH	106	-	0.95	cCACGTgt	AT2G46510;AT4G16430;AT4G17880;AT5G46830
TF_motif_seq_0410	bHLH	106	-	0.75	ccaCGTGT	AT1G32640
TFmatrixID_0506	bHLH	107	-	0.98	cACGTGtc	AT2G24260;AT2G43010;AT2G46970;AT4G28790;AT4G28800;AT4G28811;AT4G28815;AT5G61270;AT5G67110
TF_motif_seq_0300	bHLH	107	-	1	cACGTG	AT1G09530;AT2G20180;AT4G17880;AT5G46760
TF_motif_seq_0301	bHLH	107	-	1	cACGTG	AT1G32640
TF_motif_seq_0302	bHLH	107	-	1	cACGTG	AT5G08130;AT3G26744
TFmatrixID_0497	bHLH	100	+	0.96	taaaatccACGTGt	AT2G20180;AT2G46970;AT4G28790;AT4G28800;AT4G28811;AT4G28815;AT5G67110
TFmatrixID_0111	bHLH	101	+	0.89	aaaatcCACGTgtcatgt	AT1G09530
TFmatrixID_0558	bHLH	101	+	0.89	aaaatcCACGTgtcatgt	AT1G09530;AT2G46970;AT4G28790;AT4G28800;AT4G28811;AT4G28815;AT5G61270;AT5G67110
TFmatrixID_0112	bHLH	102	+	0.85	aaatcCACGTgtcatgt	AT1G09530
TFmatrixID_0559	bHLH	102	+	0.85	aaatcCACGTgtcatgt	AT1G09530;AT2G46970;AT4G28790;AT4G28800;AT4G28811;AT4G28815;AT5G61270;AT5G67110
TFmatrixID_0495	BES1	103	+	0.98	aatcCACGTgtcat	AT1G75080
TFmatrixID_0171	bHLH	104	+	0.99	atcCACGTgt	AT5G08130
TFmatrixID_0494	BES1	104	+	0.97	atccACGTGtc	AT1G19350
TFmatrixID_0505	bHLH	104	+	0.99	atcCACGTgt	AT1G09530;AT2G46970;AT4G28790;AT4G28800;AT4G28811;AT4G28815;AT5G61270;AT5G67110
TFmatrixID_0160	bHLH	105	+	1	tcCACGTgtc	AT1G32640;AT2G46510;AT4G09820;AT4G16430;AT5G46830
TFmatrixID_0161	bHLH	105	+	1	tccACGTGt	AT1G10120;AT1G18400;AT1G25330;AT1G26260;AT1G59640;AT1G68920;AT1G73830;AT3G07340;AT3G23690;AT4G34530;AT5G50915;AT5G62610
TFmatrixID_0162	bHLH	105	+	0.99	tcCACGTgtc	AT1G69010
TFmatrixID_0163	bHLH	105	+	0.94	tccACGTGtcat	AT1G10120;AT1G18400;AT1G25330;AT1G26260;AT1G68920;AT1G73830;AT2G18300;AT3G07340;AT3G23690;AT4G34530;AT5G50915;AT5G62610
TFmatrixID_0164	bHLH	105	+	1	tcCACGTgtc	AT2G20180;AT2G46970;AT4G28790;AT4G28800;AT4G28811;AT4G28815;AT5G67110
TFmatrixID_0168	bHLH	105	+	1	tcCACGTgtc	AT2G46510;AT4G16430;AT4G17880;AT5G46830
TFmatrixID_0169	bHLH	105	+	1	tcCACGTgtc	AT1G10120;AT1G18400;AT1G25330;AT1G26260;AT1G68920;AT1G73830;AT3G07340;AT3G23690;AT4G34530;AT4G36540;AT5G50915;AT5G62610
TFmatrixID_0172	bHLH	105	+	0.99	tcCACGTgtc	AT5G38860
TFmatrixID_0175	bHLH	105	+	1	tcCACGTgtc	AT1G51070;AT5G54680
TFmatrixID_0177	bHLH	105	+	1	tcCACGTgtc	AT1G03040;AT2G24260;AT3G07340;AT4G02590;AT4G28811;AT4G30980;AT4G34530;AT5G58010
TFmatrixID_0506	bHLH	105	+	0.98	tcCACGTg	AT2G24260;AT2G43010;AT2G46970;AT4G28790;AT4G28800;AT4G28811;AT4G28815;AT5G61270;AT5G67110
TFmatrixID_0597	bHLH	105	+	0.88	tcCACGTgtc	AT1G09530
TFmatrixID_0158	bHLH	106	+	0.98	cCACGTgt	AT1G01260;AT1G12860;AT2G46510;AT4G16430;AT5G46830;AT5G57150
TFmatrixID_0165	bHLH	106	+	0.97	cCACGTgt	AT1G51070;AT3G23210
TFmatrixID_0166	bHLH	106	+	0.99	cCACGTgt	AT4G00050;AT4G28790;AT4G28811;AT5G61270;AT5G67110
TFmatrixID_0170	bHLH	106	+	0.97	ccACGTGtc	AT4G28790;AT4G28800;AT4G28811;AT4G28815;AT4G36930;AT5G67110
TFmatrixID_0174	bHLH	106	+	0.75	CCACGtgt	AT1G10120;AT1G18400;AT1G25330;AT1G26260;AT1G68920;AT1G73830;AT2G24260;AT3G07340;AT3G23690;AT4G30980;AT4G34530;AT5G48560;AT5G50915;AT5G58010;AT5G62610
TFmatrixID_0179	bHLH	106	+	0.98	cCACGTgt	AT1G10120;AT1G18400;AT1G25330;AT1G26260;AT1G68920;AT1G73830;AT2G24260;AT3G07340;AT3G23690;AT4G30980;AT4G34530;AT5G50915;AT5G58010;AT5G62610
TFmatrixID_0511	bHLH	106	+	0.95	cCACGTgt	AT1G32640;AT2G46510;AT4G09820;AT4G16430;AT5G46830
TFmatrixID_0513	bHLH	106	+	0.99	cCACGTgt	AT2G46510;AT4G09820;AT4G16430;AT5G46760;AT5G46830
TFmatrixID_0514	bHLH	106	+	0.96	ccACGTGt	AT2G46510;AT4G16430;AT4G17880;AT5G46830
TFmatrixID_0157	bHLH	107	+	0.99	cACGTGt	AT2G46510;AT4G09820;AT4G16430;AT5G46830
TFmatrixID_0159	bHLH	107	+	1	cACGTGt	AT1G09530;AT2G46970;AT4G28790;AT4G28800;AT4G28811;AT4G28815;AT5G61270;AT5G67110
TFmatrixID_0173	bHLH	107	+	1	cACGTGtcat	AT2G46510;AT4G09820;AT4G16430;AT5G46760;AT5G46830
TF_motif_seq_0300	bHLH	107	+	1	CACGTg	AT1G09530;AT2G20180;AT4G17880;AT5G46760
TF_motif_seq_0301	bHLH	107	+	1	CACGTg	AT1G32640
TF_motif_seq_0302	bHLH	107	+	1	CACGTg	AT5G08130;AT3G26744
TF_motif_seq_0252	Myb/SANT;MYB;ARR-B	103	-	1	AATCC	AT2G01760;AT3G16857;AT4G16110;AT4G18020;AT4G31920;AT5G58080;AT1G67710;AT1G49190;AT2G25180;AT5G49240
TFmatrixID_0182	bZIP	102	-	0.95	aaatcCACGTgtc	AT1G45249;AT3G19290
TFmatrixID_0496	bZIP	102	-	0.92	aaatccACGTGtcatg	AT3G17609;AT5G11260
TFmatrixID_0187	bZIP	104	-	0.95	atcCACGTgt	AT2G36270
TFmatrixID_0203	bZIP	104	-	0.98	atccACGTGtca	AT3G54620
TFmatrixID_0183	bZIP	105	-	1	tccACGTGtca	AT1G49720;AT3G19290
TFmatrixID_0184	bZIP	105	-	1	tcCACGTgtc	AT1G49720;AT3G19290
TFmatrixID_0193	bZIP	106	-	0.88	ccaCGTGT	AT3G19290;AT4G34000
TFmatrixID_0194	bZIP	106	-	0.96	ccACGTGtca	AT2G35530;AT4G36730
TFmatrixID_0202	bZIP	106	-	1	ccACGTGt	AT1G03970;AT5G44080
TF_motif_seq_0115	(Motif sequence only)	104	-	0.83	atccacgTGTCA	HY5AT
TFmatrixID_0496	bZIP	102	+	0.92	aaatcCACGTgtcatg	AT3G17609;AT5G11260
TFmatrixID_0183	bZIP	104	+	0.94	atcCACGTgtc	AT1G49720;AT3G19290
TFmatrixID_0190	bZIP	104	+	0.99	atCCACGtgt	AT2G35530;AT2G46270
TFmatrixID_0194	bZIP	104	+	0.97	atcCACGTgt	AT2G35530;AT4G36730
TFmatrixID_0515	bZIP	104	+	0.84	atccACGTGtcatgttcag	AT1G49720;AT3G19290
TFmatrixID_0181	bZIP	105	+	0.99	tCCACGtgt	AT1G32150;AT2G35530
TFmatrixID_0182	bZIP	105	+	1	tccACGTGtcatg	AT1G45249;AT3G19290
TFmatrixID_0184	bZIP	105	+	0.96	tccACGTGtc	AT1G49720;AT3G19290
TFmatrixID_0192	bZIP	105	+	0.99	tCCACGtgt	AT4G01120
TFmatrixID_0187	bZIP	106	+	1	ccACGTGtca	AT2G36270
TFmatrixID_0193	bZIP	106	+	0.88	CCACGtgt	AT3G19290;AT4G34000
TFmatrixID_0202	bZIP	106	+	0.97	cCACGTgt	AT1G03970;AT5G44080
TFmatrixID_0489	bZIP	106	+	1	cCACGTgt	AT2G35530
TF_motif_seq_0019	bZIP	106	+	0.8	CCACGtgtca	AT3G54620;AT4G02640
TF_motif_seq_0424	bZIP	106	+	0.88	CCACGtgt	AT1G03970;AT2G46270;AT4G01120;AT4G36730
TF_motif_seq_0275	(Motif sequence only)	112	-	0.8	GTCAT	WBOXATNPR1
TF_motif_seq_0043	(Motif sequence only)	104	-	0.93	atcCACGTgt	ABREATRD22
TF_motif_seq_0029	(Motif sequence only)	105	-	0.9	tccacGTGTC	ACEATCHS
TF_motif_seq_0459	(Motif sequence only)	105	-	0.86	tcCACGTg	ABREATCONSENSUS
TF_motif_seq_0492	(Motif sequence only)	105	-	0.88	tccACGTGt	GBOXLERBCS
TF_motif_seq_0374	(Motif sequence only)	106	-	1	cCACGTg	ABRERATCAL
TF_motif_seq_0492	(Motif sequence only)	106	+	0.88	cCACGTgtc	GBOXLERBCS
TF_motif_seq_0374	(Motif sequence only)	107	+	1	cACGTGt	ABRERATCAL
TF_motif_seq_0459	(Motif sequence only)	107	+	0.86	cACGTGtc	ABREATCONSENSUS
TF_motif_seq_0302	bHLH	120	-	1	cAGTTG	AT5G08130;AT3G26744
TF_motif_seq_0302	bHLH	120	+	1	CAGTTg	AT5G08130;AT3G26744
TF_motif_seq_0248	(Motif sequence only)	120	-	0.8	CAGTT	MYBCOREATCYCB1
TF_motif_seq_0342	(Motif sequence only)	120	-	1	CAGTTg	MYB2CONSENSUSAT
TF_motif_seq_0302	bHLH	126	-	1	cAACTG	AT5G08130;AT3G26744
TF_motif_seq_0302	bHLH	126	+	1	CAACTg	AT5G08130;AT3G26744
TF_motif_seq_0342	(Motif sequence only)	126	+	1	cAACTG	MYB2CONSENSUSAT
TF_motif_seq_0248	(Motif sequence only)	127	+	0.8	AACTG	MYBCOREATCYCB1
TF_motif_seq_0248	(Motif sequence only)	147	-	0.8	ACGTT	MYBCOREATCYCB1
TFmatrixID_0262	GATA	153	-	1	ctGATCAac	AT3G06740;AT3G16870;AT4G16141;AT4G26150;AT5G26930;AT5G49300;AT5G56860
TF_motif_seq_0237	GATA;tify	155	-	1	GATCA	AT1G51600;AT2G45050;AT3G06740;AT3G16870;AT3G21175;AT3G24050;AT3G54810;AT3G60530;AT4G17570;AT4G24470;AT4G26150;AT4G32890;AT4G34680;AT5G25830;AT5G26930;AT5G56860;AT5G66320;AT2G18380;AT3G50870;AT4G36620
TFmatrixID_0262	GATA	152	+	1	gcTGATCaa	AT3G06740;AT3G16870;AT4G16141;AT4G26150;AT5G26930;AT5G49300;AT5G56860
TF_motif_seq_0237	GATA;tify	154	+	1	TGATC	AT1G51600;AT2G45050;AT3G06740;AT3G16870;AT3G21175;AT3G24050;AT3G54810;AT3G60530;AT4G17570;AT4G24470;AT4G26150;AT4G32890;AT4G34680;AT5G25830;AT5G26930;AT5G56860;AT5G66320;AT2G18380;AT3G50870;AT4G36620
TF_motif_seq_0275	(Motif sequence only)	156	-	0.8	ATCAA	WBOXATNPR1
TF_motif_seq_0248	(Motif sequence only)	161	-	0.8	CCTTT	MYBCOREATCYCB1
TFmatrixID_0570	TBP	169	-	0.95	tTTTTAaagt	AT1G55520;AT3G13445
TF_motif_seq_0275	(Motif sequence only)	178	+	0.8	TTGAT	WBOXATNPR1
TFmatrixID_0571	TBP	184	+	0.97	gATAAAta	AT1G55520;AT3G13445
TF_motif_seq_0444	Homeodomain;HD-ZIP	186	+	0.86	TAAATata	AT4G21750;AT4G04890
TF_motif_seq_0241	ZF-HD	191	-	1	ATAAT	AT1G75240
TF_motif_seq_0241	ZF-HD	194	-	1	ATAAT	AT1G75240
TF_motif_seq_0248	(Motif sequence only)	200	+	0.8	AACCG	MYBCOREATCYCB1
TFmatrixID_0225	TCR	210	-	0.96	aaTTTAAaag	AT3G04850
TFmatrixID_0223	TCR;CPP	207	+	0.99	caaAATTTaaaag	AT4G14770
TFmatrixID_0225	TCR	210	+	0.96	aatTTAAAag	AT3G04850
TF_motif_seq_0399	(Motif sequence only)	224	+	0.84	TTTGAat	WBBOXPCWRKY1
TF_motif_seq_0275	(Motif sequence only)	225	+	0.8	TTGAA	WBOXATNPR1
TF_motif_seq_0275	(Motif sequence only)	243	-	0.8	GTGAA	WBOXATNPR1
TFmatrixID_0288	Homeodomain;HD-ZIP	244	-	0.99	tgaATTAAtgg	AT1G05230;AT1G17920;AT3G61150;AT4G00730;AT5G46880
TFmatrixID_0287	Homeodomain;bZIP;HD-ZIP	245	-	0.94	gaATTAAtgg	AT3G61890
TFmatrixID_0280	Homeodomain;HD-ZIP	245	+	0.97	gaaTTAATgg	AT1G05230;AT1G17920;AT1G73360;AT1G79840;AT3G03260;AT3G61150;AT5G46880
TFmatrixID_0287	Homeodomain;bZIP;HD-ZIP	245	+	0.94	gaaTTAATgg	AT3G61890
TFmatrixID_0290	Homeodomain;HD-ZIP	246	+	0.98	aaTTAATgga	AT1G05230;AT1G17920;AT2G32370;AT3G61150;AT4G21750;AT5G46880
TF_motif_seq_0241	ZF-HD	248	-	1	TTAAT	AT1G75240
TF_motif_seq_0241	ZF-HD	247	+	1	ATTAA	AT1G75240
TF_motif_seq_0396	WOX	248	+	1	TTAATgg	AT2G17950
TF_motif_seq_0248	(Motif sequence only)	250	+	0.8	AATGG	MYBCOREATCYCB1
TF_motif_seq_0248	(Motif sequence only)	261	+	0.8	AAAGG	MYBCOREATCYCB1
TF_motif_seq_0248	(Motif sequence only)	262	+	0.8	AAGGG	MYBCOREATCYCB1
TF_motif_seq_0434	(Motif sequence only)	266	-	1	gtaTATCC	P1BS
TF_motif_seq_0434	(Motif sequence only)	266	+	1	GTATAtcc	P1BS
TF_motif_seq_0275	(Motif sequence only)	274	+	0.8	TCGAC	WBOXATNPR1
TF_motif_seq_0248	(Motif sequence only)	277	-	0.8	ACGTT	MYBCOREATCYCB1
TFmatrixID_0350	Myb/SANT;MYB	275	+	0.9	cgaCGTTAaat	AT4G18770
TF_motif_seq_0275	(Motif sequence only)	279	-	0.8	GTTAA	WBOXATNPR1
TFmatrixID_0628	Homeodomain;bZIP;HD-ZIP;WOX	280	-	0.95	ttaAATTAat	AT4G35550
TFmatrixID_0288	Homeodomain;HD-ZIP	281	-	0.94	taaATTAAttt	AT1G05230;AT1G17920;AT3G61150;AT4G00730;AT5G46880
TFmatrixID_0288	Homeodomain;HD-ZIP	282	+	0.94	aaaTTAATttt	AT1G05230;AT1G17920;AT3G61150;AT4G00730;AT5G46880
TFmatrixID_0569	TBP	282	-	0.97	aaattaatTTTATat	AT1G55520;AT3G13445
TF_motif_seq_0241	ZF-HD	285	-	1	TTAAT	AT1G75240
TF_motif_seq_0241	ZF-HD	284	+	1	ATTAA	AT1G75240
TFmatrixID_0585	TBP	287	-	0.97	aatTTTATatt	AT1G55520;AT3G13445
TFmatrixID_0418	TBP	290	-	1	ttTATAT	AT1G55520;AT3G13445
TF_motif_seq_0434	(Motif sequence only)	291	-	0.83	ttaTATTC	P1BS
TF_motif_seq_0366	(Motif sequence only)	303	+	0.86	CTAACaa	MYBATRD22
TF_motif_seq_0275	(Motif sequence only)	313	-	0.8	TTCAA	WBOXATNPR1
TF_motif_seq_0275	(Motif sequence only)	318	-	0.8	CTCAA	WBOXATNPR1
TF_motif_seq_0275	(Motif sequence only)	326	+	0.8	TTGAT	WBOXATNPR1
TF_motif_seq_0366	(Motif sequence only)	335	+	0.86	CTAACaa	MYBATRD22
TFmatrixID_0419	TBP	340	+	1	aaTATAT	AT1G55520;AT3G13445
TFmatrixID_0419	TBP	341	-	1	ATATAtt	AT1G55520;AT3G13445
TFmatrixID_0280	Homeodomain;HD-ZIP	348	-	0.98	tcATTAAatt	AT1G05230;AT1G17920;AT1G73360;AT1G79840;AT3G03260;AT3G61150;AT5G46880
TF_motif_seq_0241	ZF-HD	350	+	1	ATTAA	AT1G75240
TF_motif_seq_0275	(Motif sequence only)	358	-	0.8	GACAA	WBOXATNPR1
TF_motif_seq_0339	WRKY	356	+	0.95	TTGACa	AT1G13960;AT1G18860;AT1G29280;AT1G29860;AT1G30650;AT1G55600;AT1G62300;AT1G64000;AT1G66550;AT1G68150;AT1G69310;AT1G69810;AT1G80590;AT1G80840;AT2G03340;AT2G23320;AT2G24570;AT2G25000;AT2G30250;AT2G30590;AT2G34830;AT2G37260;AT2G38470;AT2G40740;AT2G40750;AT2G44745;AT2G46130;AT2G46400;AT2G47260;AT3G01080;AT3G01970;AT3G04670;AT3G56400;AT3G58710;AT4G01250;AT4G01720;AT4G04450;AT4G12020;AT4G18170;AT4G22070…
TF_motif_seq_0275	(Motif sequence only)	356	+	1	TTGAC	WBOXATNPR1
TF_motif_seq_0246	Homeodomain;TALE	357	+	1	TGACA	AT1G23380;AT1G62360;AT1G70510;AT4G08150
TF_motif_seq_0241	ZF-HD	366	-	1	TTAAT	AT1G75240
TF_motif_seq_0241	ZF-HD	378	-	1	GTAAT	AT1G75240
TF_motif_seq_0252	Myb/SANT;MYB;ARR-B	383	+	1	AGATT	AT2G01760;AT3G16857;AT4G16110;AT4G18020;AT4G31920;AT5G58080;AT1G67710;AT1G49190;AT2G25180;AT5G49240
TF_motif_seq_0275	(Motif sequence only)	387	+	0.8	TGGAC	WBOXATNPR1

## Sheet: Figure4_sel_score at least 0.9
Matrix ID	Family	Position	Strand	Similar Score	Hit Sequence	TF ID or Motif name
TFmatrixID_0300	Homeodomain;TALE	55	-	0.96	aggCGTCAtg	AT1G62360;AT1G70510;AT4G08150
TF_motif_seq_0246	Homeodomain;TALE	58	-	1	CGTCA	AT1G23380;AT1G62360;AT1G70510;AT4G08150
TFmatrixID_0289	Homeodomain;HD-ZIP	63	-	0.97	tgAATCAtgc	AT2G22800;AT4G16780;AT4G17460;AT4G37790;AT5G06710;AT5G47370
TF_motif_seq_0241	ZF-HD	87	+	1	ATTAA	AT1G75240
TF_motif_seq_0444	Homeodomain;HD-ZIP	89	+	0.97	TAAATgaa	AT4G21750;AT4G04890
TFmatrixID_0111	bHLH	101	-	0.9	aaaatccACGTGtcatgt	AT1G09530
TFmatrixID_0112	bHLH	101	-	0.9	aaaatccACGTGtcatg	AT1G09530
TFmatrixID_0558	bHLH	101	-	0.9	aaaatccACGTGtcatgt	AT1G09530;AT2G46970;AT4G28790;AT4G28800;AT4G28811;AT4G28815;AT5G61270;AT5G67110
TFmatrixID_0559	bHLH	101	-	0.9	aaaatccACGTGtcatg	AT1G09530;AT2G46970;AT4G28790;AT4G28800;AT4G28811;AT4G28815;AT5G61270;AT5G67110
TFmatrixID_0163	bHLH	103	-	0.94	aatcCACGTgtc	AT1G10120;AT1G18400;AT1G25330;AT1G26260;AT1G68920;AT1G73830;AT2G18300;AT3G07340;AT3G23690;AT4G34530;AT5G50915;AT5G62610
TFmatrixID_0173	bHLH	103	-	1	aatcCACGTg	AT2G46510;AT4G09820;AT4G16430;AT5G46760;AT5G46830
TFmatrixID_0160	bHLH	105	-	1	tccACGTGtc	AT1G32640;AT2G46510;AT4G09820;AT4G16430;AT5G46830
TFmatrixID_0162	bHLH	105	-	0.99	tccACGTGtc	AT1G69010
TFmatrixID_0164	bHLH	105	-	1	tccACGTGtc	AT2G20180;AT2G46970;AT4G28790;AT4G28800;AT4G28811;AT4G28815;AT5G67110
TFmatrixID_0168	bHLH	105	-	1	tccACGTGtc	AT2G46510;AT4G16430;AT4G17880;AT5G46830
TFmatrixID_0169	bHLH	105	-	1	tccACGTGtc	AT1G10120;AT1G18400;AT1G25330;AT1G26260;AT1G68920;AT1G73830;AT3G07340;AT3G23690;AT4G34530;AT4G36540;AT5G50915;AT5G62610
TFmatrixID_0170	bHLH	105	-	1	tcCACGTgt	AT4G28790;AT4G28800;AT4G28811;AT4G28815;AT4G36930;AT5G67110
TFmatrixID_0172	bHLH	105	-	0.99	tccACGTGtc	AT5G38860
TFmatrixID_0175	bHLH	105	-	1	tccACGTGtc	AT1G51070;AT5G54680
TFmatrixID_0177	bHLH	105	-	1	tccACGTGtc	AT1G03040;AT2G24260;AT3G07340;AT4G02590;AT4G28811;AT4G30980;AT4G34530;AT5G58010
TFmatrixID_0157	bHLH	106	-	0.99	cCACGTg	AT2G46510;AT4G09820;AT4G16430;AT5G46830
TFmatrixID_0158	bHLH	106	-	1	ccACGTGt	AT1G01260;AT1G12860;AT2G46510;AT4G16430;AT5G46830;AT5G57150
TFmatrixID_0159	bHLH	106	-	1	cCACGTg	AT1G09530;AT2G46970;AT4G28790;AT4G28800;AT4G28811;AT4G28815;AT5G61270;AT5G67110
TFmatrixID_0161	bHLH	106	-	1	cCACGTgtc	AT1G10120;AT1G18400;AT1G25330;AT1G26260;AT1G59640;AT1G68920;AT1G73830;AT3G07340;AT3G23690;AT4G34530;AT5G50915;AT5G62610
TFmatrixID_0166	bHLH	106	-	0.98	ccACGTGt	AT4G00050;AT4G28790;AT4G28811;AT5G61270;AT5G67110
TFmatrixID_0171	bHLH	106	-	1	ccACGTGtca	AT5G08130
TFmatrixID_0179	bHLH	106	-	0.97	ccACGTGt	AT1G10120;AT1G18400;AT1G25330;AT1G26260;AT1G68920;AT1G73830;AT2G24260;AT3G07340;AT3G23690;AT4G30980;AT4G34530;AT5G50915;AT5G58010;AT5G62610
TFmatrixID_0497	bHLH	106	-	0.99	cCACGTgtcatgtt	AT2G20180;AT2G46970;AT4G28790;AT4G28800;AT4G28811;AT4G28815;AT5G67110
TFmatrixID_0505	bHLH	106	-	0.94	ccACGTGtca	AT1G09530;AT2G46970;AT4G28790;AT4G28800;AT4G28811;AT4G28815;AT5G61270;AT5G67110
TFmatrixID_0511	bHLH	106	-	0.95	ccACGTGt	AT1G32640;AT2G46510;AT4G09820;AT4G16430;AT5G46830
TFmatrixID_0513	bHLH	106	-	0.99	ccACGTGt	AT2G46510;AT4G09820;AT4G16430;AT5G46760;AT5G46830
TFmatrixID_0514	bHLH	106	-	0.95	cCACGTgt	AT2G46510;AT4G16430;AT4G17880;AT5G46830
TFmatrixID_0506	bHLH	107	-	0.98	cACGTGtc	AT2G24260;AT2G43010;AT2G46970;AT4G28790;AT4G28800;AT4G28811;AT4G28815;AT5G61270;AT5G67110
TF_motif_seq_0300	bHLH	107	-	1	cACGTG	AT1G09530;AT2G20180;AT4G17880;AT5G46760
TF_motif_seq_0301	bHLH	107	-	1	cACGTG	AT1G32640
TF_motif_seq_0302	bHLH	107	-	1	cACGTG	AT5G08130;AT3G26744
TFmatrixID_0497	bHLH	100	+	0.96	taaaatccACGTGt	AT2G20180;AT2G46970;AT4G28790;AT4G28800;AT4G28811;AT4G28815;AT5G67110
TFmatrixID_0171	bHLH	104	+	0.99	atcCACGTgt	AT5G08130
TFmatrixID_0505	bHLH	104	+	0.99	atcCACGTgt	AT1G09530;AT2G46970;AT4G28790;AT4G28800;AT4G28811;AT4G28815;AT5G61270;AT5G67110
TFmatrixID_0160	bHLH	105	+	1	tcCACGTgtc	AT1G32640;AT2G46510;AT4G09820;AT4G16430;AT5G46830
TFmatrixID_0161	bHLH	105	+	1	tccACGTGt	AT1G10120;AT1G18400;AT1G25330;AT1G26260;AT1G59640;AT1G68920;AT1G73830;AT3G07340;AT3G23690;AT4G34530;AT5G50915;AT5G62610
TFmatrixID_0162	bHLH	105	+	0.99	tcCACGTgtc	AT1G69010
TFmatrixID_0163	bHLH	105	+	0.94	tccACGTGtcat	AT1G10120;AT1G18400;AT1G25330;AT1G26260;AT1G68920;AT1G73830;AT2G18300;AT3G07340;AT3G23690;AT4G34530;AT5G50915;AT5G62610
TFmatrixID_0164	bHLH	105	+	1	tcCACGTgtc	AT2G20180;AT2G46970;AT4G28790;AT4G28800;AT4G28811;AT4G28815;AT5G67110
TFmatrixID_0168	bHLH	105	+	1	tcCACGTgtc	AT2G46510;AT4G16430;AT4G17880;AT5G46830
TFmatrixID_0169	bHLH	105	+	1	tcCACGTgtc	AT1G10120;AT1G18400;AT1G25330;AT1G26260;AT1G68920;AT1G73830;AT3G07340;AT3G23690;AT4G34530;AT4G36540;AT5G50915;AT5G62610
TFmatrixID_0172	bHLH	105	+	0.99	tcCACGTgtc	AT5G38860
TFmatrixID_0175	bHLH	105	+	1	tcCACGTgtc	AT1G51070;AT5G54680
TFmatrixID_0177	bHLH	105	+	1	tcCACGTgtc	AT1G03040;AT2G24260;AT3G07340;AT4G02590;AT4G28811;AT4G30980;AT4G34530;AT5G58010
TFmatrixID_0506	bHLH	105	+	0.98	tcCACGTg	AT2G24260;AT2G43010;AT2G46970;AT4G28790;AT4G28800;AT4G28811;AT4G28815;AT5G61270;AT5G67110
TFmatrixID_0158	bHLH	106	+	0.98	cCACGTgt	AT1G01260;AT1G12860;AT2G46510;AT4G16430;AT5G46830;AT5G57150
TFmatrixID_0165	bHLH	106	+	0.97	cCACGTgt	AT1G51070;AT3G23210
TFmatrixID_0166	bHLH	106	+	0.99	cCACGTgt	AT4G00050;AT4G28790;AT4G28811;AT5G61270;AT5G67110
TFmatrixID_0170	bHLH	106	+	0.97	ccACGTGtc	AT4G28790;AT4G28800;AT4G28811;AT4G28815;AT4G36930;AT5G67110
TFmatrixID_0179	bHLH	106	+	0.98	cCACGTgt	AT1G10120;AT1G18400;AT1G25330;AT1G26260;AT1G68920;AT1G73830;AT2G24260;AT3G07340;AT3G23690;AT4G30980;AT4G34530;AT5G50915;AT5G58010;AT5G62610
TFmatrixID_0511	bHLH	106	+	0.95	cCACGTgt	AT1G32640;AT2G46510;AT4G09820;AT4G16430;AT5G46830
TFmatrixID_0513	bHLH	106	+	0.99	cCACGTgt	AT2G46510;AT4G09820;AT4G16430;AT5G46760;AT5G46830
TFmatrixID_0514	bHLH	106	+	0.96	ccACGTGt	AT2G46510;AT4G16430;AT4G17880;AT5G46830
TFmatrixID_0157	bHLH	107	+	0.99	cACGTGt	AT2G46510;AT4G09820;AT4G16430;AT5G46830
TFmatrixID_0159	bHLH	107	+	1	cACGTGt	AT1G09530;AT2G46970;AT4G28790;AT4G28800;AT4G28811;AT4G28815;AT5G61270;AT5G67110
TFmatrixID_0173	bHLH	107	+	1	cACGTGtcat	AT2G46510;AT4G09820;AT4G16430;AT5G46760;AT5G46830
TF_motif_seq_0300	bHLH	107	+	1	CACGTg	AT1G09530;AT2G20180;AT4G17880;AT5G46760
TF_motif_seq_0301	bHLH	107	+	1	CACGTg	AT1G32640
TF_motif_seq_0302	bHLH	107	+	1	CACGTg	AT5G08130;AT3G26744
TF_motif_seq_0252	Myb/SANT;MYB;ARR-B	103	-	1	AATCC	AT2G01760;AT3G16857;AT4G16110;AT4G18020;AT4G31920;AT5G58080;AT1G67710;AT1G49190;AT2G25180;AT5G49240
TF_motif_seq_0302	bHLH	120	-	1	cAGTTG	AT5G08130;AT3G26744
TF_motif_seq_0302	bHLH	120	+	1	CAGTTg	AT5G08130;AT3G26744
TF_motif_seq_0342	(Motif sequence only)	120	-	1	CAGTTg	MYB2CONSENSUSAT
TF_motif_seq_0302	bHLH	126	-	1	cAACTG	AT5G08130;AT3G26744
TF_motif_seq_0302	bHLH	126	+	1	CAACTg	AT5G08130;AT3G26744
TF_motif_seq_0342	(Motif sequence only)	126	+	1	cAACTG	MYB2CONSENSUSAT
TF_motif_seq_0241	ZF-HD	191	-	1	ATAAT	AT1G75240
TF_motif_seq_0241	ZF-HD	194	-	1	ATAAT	AT1G75240
TFmatrixID_0288	Homeodomain;HD-ZIP	244	-	0.99	tgaATTAAtgg	AT1G05230;AT1G17920;AT3G61150;AT4G00730;AT5G46880
TFmatrixID_0287	Homeodomain;bZIP;HD-ZIP	245	-	0.94	gaATTAAtgg	AT3G61890
TFmatrixID_0280	Homeodomain;HD-ZIP	245	+	0.97	gaaTTAATgg	AT1G05230;AT1G17920;AT1G73360;AT1G79840;AT3G03260;AT3G61150;AT5G46880
TFmatrixID_0287	Homeodomain;bZIP;HD-ZIP	245	+	0.94	gaaTTAATgg	AT3G61890
TFmatrixID_0290	Homeodomain;HD-ZIP	246	+	0.98	aaTTAATgga	AT1G05230;AT1G17920;AT2G32370;AT3G61150;AT4G21750;AT5G46880
TF_motif_seq_0241	ZF-HD	248	-	1	TTAAT	AT1G75240
TF_motif_seq_0241	ZF-HD	247	+	1	ATTAA	AT1G75240
TF_motif_seq_0396	WOX	248	+	1	TTAATgg	AT2G17950
TF_motif_seq_0434	(Motif sequence only)	266	-	1	gtaTATCC	P1BS
TF_motif_seq_0434	(Motif sequence only)	266	+	1	GTATAtcc	P1BS
TFmatrixID_0350	Myb/SANT;MYB	275	+	0.9	cgaCGTTAaat	AT4G18770
TFmatrixID_0628	Homeodomain;bZIP;HD-ZIP;WOX	280	-	0.95	ttaAATTAat	AT4G35550
TFmatrixID_0288	Homeodomain;HD-ZIP	281	-	0.94	taaATTAAttt	AT1G05230;AT1G17920;AT3G61150;AT4G00730;AT5G46880
TFmatrixID_0288	Homeodomain;HD-ZIP	282	+	0.94	aaaTTAATttt	AT1G05230;AT1G17920;AT3G61150;AT4G00730;AT5G46880
TF_motif_seq_0241	ZF-HD	285	-	1	TTAAT	AT1G75240
TF_motif_seq_0241	ZF-HD	284	+	1	ATTAA	AT1G75240
TFmatrixID_0280	Homeodomain;HD-ZIP	348	-	0.98	tcATTAAatt	AT1G05230;AT1G17920;AT1G73360;AT1G79840;AT3G03260;AT3G61150;AT5G46880
TF_motif_seq_0241	ZF-HD	350	+	1	ATTAA	AT1G75240
TF_motif_seq_0339	WRKY	356	+	0.95	TTGACa	AT1G13960;AT1G18860;AT1G29280;AT1G29860;AT1G30650;AT1G55600;AT1G62300;AT1G64000;AT1G66550;AT1G68150;AT1G69310;AT1G69810;AT1G80590;AT1G80840;AT2G03340;AT2G23320;AT2G24570;AT2G25000;AT2G30250;AT2G30590;AT2G34830;AT2G37260;AT2G38470;AT2G40740;AT2G40750;AT2G44745;AT2G46130;AT2G46400;AT2G47260;AT3G01080;AT3G01970;AT3G04670;AT3G56400;AT3G58710;AT4G01250;AT4G01720;AT4G04450;AT4G12020;AT4G18170;AT4G22070…
TF_motif_seq_0275	(Motif sequence only)	356	+	1	TTGAC	WBOXATNPR1
TF_motif_seq_0246	Homeodomain;TALE	357	+	1	TGACA	AT1G23380;AT1G62360;AT1G70510;AT4G08150
TF_motif_seq_0241	ZF-HD	366	-	1	TTAAT	AT1G75240
TF_motif_seq_0241	ZF-HD	378	-	1	GTAAT	AT1G75240
TF_motif_seq_0252	Myb/SANT;MYB;ARR-B	383	+	1	AGATT	AT2G01760;AT3G16857;AT4G16110;AT4G18020;AT4G31920;AT5G58080;AT1G67710;AT1G49190;AT2G25180;AT5G49240

## Sheet: Motifs Salazar-Henao et al 2016
extracted from results of Salazar-Henao et al., 2016		motifs in the used ProETC1 promoter fragment (+/- 50 nt)
Pat. ID	Pattern	strand	sequence in fragment	PlantPANresult-Fragment+/-50nt	motif in added 50nt before	motif in added 50 nt after	position in fragment (fragment = ProETC1-932-ProETC1-595) (1=ProETC1-982 -> fragment - 50 nt)
RHE	TGNNNCGCACG			0	0	0
GCC-box	GCCGNM			0	0	0
Up1	GGCCCAWWW			0	0	0
AAACGACACCGTTT	AAACGACACCGTTT			0	0	0
CCGTCG	CCGTCG			0	0	0
CTCTT	CTCTT	-	CTCTT	1	1 (-)		40-36
ABRE	CACGTGGC			0	0	0
GATC	TGATCR	+	TGATCA	1	0	0	154-159 (+/-)
TCCACCATA	TCCACCATA			0	0	0
TGGTTAG	TGGTTAG			0	0	0
AAAG	AAAAG	+, -	AAAAG	6	1 (+)	1 (-)	162-166 (-), 167-171 (-), 215-219 (+), 323-327 (-)
CACGTG	CACGTG	+	CACGTG	1	0	0	107-112 (+/-)
AC-I	ACCTACC			0	0	0
AC-II	ACCAACC			0	0	0
AC-III	ACCTAAC			0	0	0
ARF	TGTCTC			0	0	0
